1 **Airway IRF7<sup>hi</sup> versus IRF7<sup>lo</sup> molecular response patterns determine clinical phenotypes in**  
2 **children with acute wheezing**

3

4 Siew-Kim Khoo, BSc (Hons)<sup>1,2</sup>, James Read BSc (Hons)<sup>2</sup>, Kimberley Franks, BSc (Hons)<sup>1,2</sup>,  
5 Guicheng Zhang, PhD<sup>1,4,5</sup>, Joeline Bizzantino, PhD<sup>1,2</sup>, Laura Coleman, BSc (Hons)<sup>1,2</sup>,  
6 Christopher McCrae, BSc (Hons)<sup>6</sup>, Lisa Öberg, MSc<sup>6</sup>, Niamh Troy, BSc (Hons)<sup>2</sup>, Franciska  
7 Prastanti, MBBS<sup>1,2</sup>, Janet Everard<sup>1,2</sup>, Stephen Oo, MBBS, FRACP<sup>3</sup>, Meredith L Borland, MBBS,  
8 FACEM<sup>7,8</sup>, Rose A Maciewicz, PhD<sup>6</sup>, Peter N Le Souëf, MD<sup>2,3§</sup>, Ingrid A Laing, PhD<sup>1,2§</sup>, Anthony  
9 Bosco, PhD<sup>2§\*</sup>.

10

11 <sup>§</sup> Joint senior authors

12 \*Corresponding Author: [Anthony.Bosco@telethonkids.org.au](mailto:Anthony.Bosco@telethonkids.org.au)

13 Anthony Bosco

14 Telethon Kids Institute

15 100 Roberts Road

16 Subiaco 6008, Western Australia

17 Tel no.: +618 9489 7895

18 Fax no.: +618 9489 7700

19

20 **Affiliations**

21 <sup>1</sup> Division of Cardiovascular and Respiratory Sciences, The University of Western Australia,  
22 Perth, Western Australia, 6009, Australia.

23 <sup>2</sup> Telethon Kids Institute, The University of Western Australia, Perth, Western Australia,  
24 6008, Australia.

25 <sup>3</sup> Division of Paediatrics, The University of Western Australia, Perth, Western Australia, 6009,  
26 Australia.

27 <sup>4</sup> School of Public Health, Curtin University, Perth, Western Australia, 6102, Australia.

28 <sup>5</sup> Centre for Genetic Origins of Health and Disease, The University of Western Australia and  
29 Curtin University, Perth, Western Australia, 6009 and 6102, Australia.

30 <sup>6</sup> Respiratory, Inflammation and Autoimmunity, Innovative Medicines & Early Development  
31 (IMED) Biotech Unit, AstraZeneca, Gothenburg, 431 50 Mölndal, Sweden.

32 <sup>7</sup> Emergency Department, Princess Margaret Hospital for Children, Perth, Western Australia,  
33 6008, Australia.

34 <sup>8</sup> Divisions of Paediatrics and Emergency Medicine, School of Medicine, The University of  
35 Western Australia, Perth, Western Australia, 6009, Australia.

36

### 37 **Summary**

38 Asthma exacerbations are triggered by rhinovirus infections. We employed a systems  
39 biology approach to delineate upper airway gene network patterns underlying asthma  
40 exacerbation phenotypes in children. Cluster analysis unveiled distinct IRF7<sup>hi</sup> versus  
41 IRF7<sup>lo</sup> molecular phenotypes, the former exhibiting robust upregulation of Th1/type I  
42 interferon responses and the latter an alternative signature marked by upregulation of  
43 cytokine and growth factor signalling and downregulation of interferon gamma. The two  
44 phenotypes also produced distinct clinical phenotypes. For IRF7<sup>lo</sup> versus IRF7<sup>hi</sup>: symptom  
45 duration prior to hospital presentation was more than twice as long from initial symptoms  
46 ( $p=0.011$ ) and nearly three times as long for cough ( $p<0.001$ ); the odds ratio of admission to  
47 hospital was increased more than four-fold ( $p=0.018$ ); and time to recurrence was shorter  
48 ( $p=0.015$ ). In summary, our findings demonstrate that asthma exacerbations in children can  
49 be divided into IRF7<sup>hi</sup> versus IRF7<sup>lo</sup> phenotypes with associated differences in clinical  
50 phenotypes.

51

52

53 **Key Words:** Asthma, wheeze, rhinovirus, innate immunity, gene networks, gene expression  
54 profiling, systems biology.

55

### 56 **Abbreviations**

57 AHR, airway hyperresponsiveness; ARG1, Arginase 1, CSF3, Colony Stimulating Factor 3;  
58 CD38, Cluster of Differentiation 38; CD163, Cluster of Differentiation 163; cDCs,  
59 conventional (or myeloid) dendritic cells; DDX60, DExD/H-Box Helicase 60; ED, Emergency  
60 Department; EGF, Epidermal Growth Factor; ERK, Extracellular signal-Regulated Kinase;  
61 FCER1G, Fc Fragment Of IgE Receptor Ig; HMBS, Hydroxymethylbilane Synthase; IFNg,  
62 Interferon Gamma; IFNL1, Interferon Lambda 1; IL-1R2, Interleukin 1 Receptor Type 2; IRF7,  
63 Interferon Regulatory Factor 7; ISG15, Interferon-stimulated gene 15; MDA5, Melanoma

64 Differentiation-Associated protein 5; MX1, Myxovirus Resistance Protein 1; NAD,  
65 nicotinamide adenine dinucleotide; NCR1, Natural cytotoxicity triggering receptor 1; OSM,  
66 Oncostatin M; PD-L1, Programmed Death-Ligand 1; PPIA, Peptidylprolyl Isomerase A; PPIB  
67 Peptidylprolyl Isomerase B; RSAD2, Radical S-adenosyl methionine domain-containing  
68 protein 2; RSV, respiratory syncytial virus; RT-qPCR, quantitative reverse transcription PCR;  
69 RV, rhinovirus; sPLA2, secretory Phospholipase A2; TGFb, Transforming Growth Factor beta;  
70 THBS1, Thrombospondin 1; TNF, Tumor Necrosis Factor; TLR2, Toll-like Receptor 2.

71

## 72 **Introduction**

73

74 Exacerbations of asthma and wheeze are mostly triggered by respiratory viral infections and  
75 are one of the most common reasons for a child to seek emergency care.<sup>1</sup> Previous studies  
76 from our group have demonstrated that rhinovirus (RV) species C is the most frequent viral  
77 pathogen detected in children who present to the local emergency department (ED) with an  
78 asthma exacerbation.<sup>2</sup> However, the molecular mechanisms that determine susceptibility to  
79 RV and expression of respiratory symptoms are not well understood. Previous investigations  
80 of airway epithelial cells infected with RV *in vitro* found that type I and III interferon  
81 responses were deficient in adults with asthma, leading to impaired viral control and  
82 exaggerated secondary responses.<sup>3, 4</sup> However, this finding was replicated in some studies  
83 but not others.<sup>5</sup> Human adult asthmatic volunteers experimentally infected with RV *in vivo*  
84 have exaggerated IL-25 and IL-33 responses, which drive Th2 inflammation.<sup>6, 7</sup> Although  
85 these data provide a plausible mechanism to link RV infection with the pathogenesis of  
86 asthma, they are based on experimental models with artificial infections from laboratory RV  
87 strains. Hence, the extent they can recreate the complex environmental conditions  
88 underpinning natural RV-induced exacerbations is unclear.<sup>1, 8</sup> Indeed, studies of naturally  
89 occurring virus-induced exacerbations report increased rather than decreased interferon  
90 responses.<sup>9-11</sup> In this study, we have utilized an unbiased, systems biology approach to  
91 elucidate the innate immune mechanisms that are operating in the upper airways during  
92 natural exacerbations of asthma or wheezing in children.<sup>9, 10</sup> Our findings provide new  
93 insights into the role of gene networks, particularly IRF7, and their relationship to clinical  
94 phenotypes in this disease.

95

## 96 **Results**

97

### 98 *Characteristics of the study population*

99

100 The study was based on a case/control design. The cases (n=56) consisted of children who  
101 presented to the ED with an acute exacerbation of asthma or wheeze. The controls  
102 consisted of children who were either siblings of the cases, or they were recruited from the  
103 general community (controls, n=31). Convalescent samples (n=19) were available from  
104 children after they had recovered from an acute exacerbation of asthma or wheeze, but  
105 only a subset of these convalescent samples (n=5/19) were paired with acute samples.  
106 Samples from an independent group of children (n=99) with exacerbations of asthma or  
107 wheeze were utilised as a replication cohort. The characteristics of the study participants  
108 are presented in Table 1.

109

110 Children with wheezing exacerbations were younger (mean = 4.35 (SD 3.31) years) than  
111 controls (6.40 (SD 4.41) years,  $p = 0.025$ ) and had fewer Caucasians (46.4% vs 78.6%,  $p =$   
112  $0.006$ ). A higher proportion of the children with wheezing exacerbations were sampled  
113 during winter, compared to convalescence ( $p = 0.001$ ) and controls ( $p = 0.028$ ). Respiratory  
114 virus, in particular, RV, was widely detected during wheezing exacerbations (87.0%, and  
115 66.1%, respectively) compared with convalescence (42.1% and 26.3%,  $p < 0.001$  and  $p =$   
116  $0.003$ , respectively) and controls (58.1% and 32.3%,  $p = 0.004$  and  $p = 0.003$ , respectively).  
117 RV-C was more prevalent during wheezing exacerbations (46.4%) compared with controls  
118 (12.9%,  $p = 0.002$ ). The number of viruses detected during acute exacerbations (1.13 (SD  
119 0.76) was higher than during convalescence (0.47 (SD 0.61),  $p = 0.001$ ). No difference in  
120 bacterial detection was observed between the groups.

121

122 The proportion of children with wheezing exacerbations recruited in winter in the  
123 replication cohort was lower than the discovery cohort ( $p < 0.001$ , Table 1). The replication  
124 cohort was also more atopic (78.8% vs 60.7%,  $p = 0.024$ ), and had lower detection rates of  
125 respiratory viral and bacterial pathogens compared to the latter. Respiratory symptoms,  
126 hospital admissions and medication usage were not different in the discovery and  
127 replication cohorts.

128

129 *Gene expression profiling of exacerbation responses in the upper airways*

130

131 Nasal swab specimens were collected from the children and gene expression patterns were  
132 profiled on microarrays. Cellular composition data of the samples was not available, and  
133 therefore a computational approach was employed to estimate the proportions of different  
134 cell types directly from the microarray profiles.<sup>31</sup> As illustrated in Figure 1a, the highest  
135 proportions were observed for neutrophils, epithelial cells, and monocytes. Stratification of  
136 the subjects by case/control status and RV detection revealed that wheezing exacerbations  
137 were associated with increased proportions of M1 macrophages and decreased proportions  
138 of conventional dendritic cells (Figure 1b). The proportions of the other cell types were  
139 mostly comparable across the groups. The relationship between case/control status, RV  
140 detection and cellular composition for each individual child is illustrated in Figure 1c.

141

142 To identify differentially expressed genes, we undertook group-wise comparisons employing  
143 *LIMMA* in combination with *Surrogate Variable Analysis*, which adjusts the analysis for all  
144 estimated sources of unwanted biological and technical variation (See Methods).  
145 Comparison of gene expression patterns between children with RV positive wheezing  
146 exacerbations (n=37) versus RV negative controls (n=21) revealed that 137 genes were  
147 upregulated and 82 genes were downregulated (adjusted p-value < 0.05, Table S1).  
148 Pathways analysis demonstrated that the upregulated genes were highly enriched for type I  
149 interferon signalling (adjusted p-value =  $4.8 \times 10^{-22}$ , relevant genes are highlighted in Table  
150 S1). Type I interferon signalling (adjusted p-value =  $8.5 \times 10^{-31}$ , Table S2) was also  
151 upregulated in children with RV positive exacerbations in comparison to RV negative  
152 convalescent children (n=14).

153

154 Gene expression patterns were then assessed in children with RV negative exacerbations.  
155 Comparison of these children (n=19) with RV negative controls (n=21) revealed that 17  
156 genes were upregulated and 10 genes were downregulated (adjusted p-value < 0.05, Table  
157 S3). Similar results were obtained by comparing children with RV negative exacerbations  
158 versus RV negative convalescent children (n=14), where 30 differentially expressed genes  
159 were identified (adjusted p-value < 0.05, Table S4). While a subset of these genes were also

160 upregulated in children with RV positive exacerbations (e.g. IL-18R1, CD163), a notable  
161 difference was the lack of an interferon signature.

162

### 163 *Discovery of molecular sub-phenotypes of acute wheezing illnesses*

164

165 The findings above suggested that children with RV positive exacerbations mount an  
166 interferon response but there appears to be additional heterogeneity. As the data analysis  
167 strategy relied on group-wise comparisons (with LIMMA/SVA), this approach cannot shed  
168 any insight into subject-to-subject variations in gene expression patterns within each group.  
169 To obtain more detailed information in this regard, we employed hierarchical clustering (See  
170 Methods). To ensure that the clustering did not simply reflect variations in cellular  
171 composition (observed above in Figure 1), we utilised a set of negative control genes (i.e.  
172 genes not related to the outcome of interest) to model unwanted variation in the data, and  
173 removed these effects using regression (See Methods and Figure S1). This strategy  
174 preserves the gene expression signature associated with acute exacerbations in the data,  
175 and removes the strong correlation structure between samples that reflect variations in  
176 cellular composition (Figure S1). As illustrated in Figure 2a, cluster analysis of the corrected  
177 data divided the subjects into five distinct clusters or molecular phenotypes (labelled S1-S5).  
178 Likewise, the genes were also divided into five clusters labelled G1-G5. Notably, the majority  
179 of children with exacerbations (45/56 = 80%) were found within clusters S1 and S2, and  
180 there was no difference in RV detection between these cluster groups of children (RV  
181 detection rates for children with exacerbations in cluster S1 vs cluster S2 were 73% vs 58%,  
182 p-value = 0.347). The other three clusters S3-S5 contained the bulk of the controls and the  
183 convalescent samples, as well as 11 remaining children with exacerbations.

184

185 To examine the overall expression of each gene cluster across the children, principal  
186 component analysis was employed to summarise the expression data for each cluster, and  
187 the first principal component was plotted across the subjects, stratified into their respective  
188 clusters. This analysis revealed that the most striking difference between the subjects in  
189 cluster groups S1 and S2 was the differential expression of the set of genes in cluster G5  
190 (Figure 2b), and this cluster of genes was strongly enriched for type I interferon signalling  
191 (data not shown). Moreover, prior knowledge based reconstruction of the wiring diagram of

192 the underlying gene networks for each cluster revealed that IRF7 – a master regulator of  
193 type I interferon responses,<sup>32</sup> was the dominant hub gene identified in cluster G5.  
194 Accordingly, we designated the children in clusters S1 and S2 as IRF7<sup>hi</sup> versus IRF7<sup>lo</sup>  
195 molecular phenotypes.

196

#### 197 *Network hubs and driver genes underlying IRF7<sup>hi</sup> versus IRF7<sup>lo</sup> molecular phenotypes*

198

199 To further characterize the IRF7 phenotypes, children with exacerbations were stratified  
200 into IRF7<sup>hi</sup> (n=26) and IRF7<sup>lo</sup> (n=19) subgroups, and compared with RV negative controls  
201 employing LIMMA/SVA. We followed this strategy because a direct comparison of IRF7<sup>hi/low</sup>  
202 phenotypes would only reveal differences between the respective responses, and we  
203 wanted to know if the phenotypes operate through discrete and/or overlapping pathways.  
204 The data showed that 208 genes were upregulated and 157 genes were downregulated in  
205 children with IRF7<sup>hi</sup> exacerbations compared with controls (Figure 3a, left panel; Table S5).  
206 IRF7<sup>lo</sup> exacerbations were characterized by upregulation of 96 genes, and downregulation of  
207 31 genes downregulated (Figure 3a, right panel; Table S6). These analyses revealed an  
208 overlapping response signature, which comprised 52 upregulated genes and 11  
209 downregulated genes. Gene network analysis revealed that IRF7 gene networks were  
210 upregulated in the children with IRF7<sup>hi</sup> exacerbations (Figure 3b, left panel). IRF7<sup>lo</sup>  
211 exacerbations lacked an IRF7 signature, and instead were characterized by upregulation of  
212 Th2-associated pathways (e.g. IL-4R, FCER1G, ARG1) and downregulation of IFN $\gamma$  (Figure 3b,  
213 right panel). We also built a combined network to illustrate the unique and overlapping  
214 gene network patterns for each phenotype (Figure 4).

215

216 Next we employed upstream regulator analysis to identify molecular drivers of IRF7<sup>hi</sup> and  
217 IRF7<sup>lo</sup> exacerbation responses.<sup>28, 33</sup> The data showed that IRF7<sup>hi</sup> exacerbations were  
218 putatively driven by upregulation of IFNL1, IRF7, and interferon alpha signalling (Figure 3c,  
219 left panel, Table S7). In contrast, IRF7<sup>lo</sup> exacerbations were predicted to be driven by  
220 upregulation of cytokine and growth factor signalling pathways (e.g. IL-6, IL-10, TGF $\beta$ , ERK,  
221 CSF3, EGF, Figure 3c, right panel, Table S8). It is noteworthy that multiple inflammatory  
222 pathways (e.g. IL-1 $\beta$ , IL-2, IL-4, IL-13, TNF, OSM, IFN $\gamma$ ) featured in the upstream regulator  
223 analysis results for IRF7<sup>lo</sup> exacerbations, however the activation Z-scores were not

224 significant, indicating that the direction of the gene expression changes in terms of up- and  
225 down- regulation were not consistent with the known role of these pathways in the  
226 regulation of gene expression.<sup>28</sup>

227

228 We re-examined the cellular composition data from Figure 1 in IRF7<sup>hi</sup> and IRF7<sup>lo</sup>  
229 exacerbation responses, and we found that both phenotypes were associated with  
230 decreased proportions of cDCs, and similar proportions of M1 macrophages (Figure S2).  
231 Stratification of IRF7 phenotypes by RV detection revealed further heterogeneity, including  
232 upregulated proportions of Th2 cells in children with RV positive, IRF7<sup>lo</sup> exacerbations  
233 (Figure S3).

234

235 *Candidate pathways linking exacerbation responses with asthma-related traits*

236

237 To identify candidate pathways that potentially link exacerbation responses with expression  
238 of asthma-related traits, we employed Pubmatrix<sup>34</sup> to screen the literature for relevant  
239 studies (Table S9). We found that multiple genes which were upregulated in children with  
240 IRF7<sup>hi</sup> exacerbations (e.g. CASP1, CD274, CXCL11, DDX58, Haptoglobin, IFIH1, IRF7, P2RX7,  
241 PHF11, Selectin L, SERPING1, STAT1, TLR4, TLR5, TNFAIP3, TNFAIP6, TNFSF13B) or IRF7<sup>lo</sup>  
242 exacerbations (e.g. AGR3, C3AR1, EPCAM, IL4R, LDLR, NCR1, OCLN, SERPINB2, SERPINB3,  
243 THBS1, TIMP1, VCAN) have been previously studied in the context of asthma and/or related  
244 traits. Moreover, overlap signature of genes that were commonly upregulated in children  
245 with IRF7<sup>hi</sup> and IRF7<sup>lo</sup> exacerbations have also been previously studied in this context (e.g.  
246 ADAM17, ARG1, ARG2, CD163, CD38, FCER1G, IL18R1, PLA2G4A, S100A12, TLR2).

247

248 *Clinical characteristics of IRF7<sup>hi</sup> versus IRF7<sup>lo</sup> exacerbations*

249

250 We next investigated the biological and clinical characteristics of IRF7<sup>hi</sup> and IRF7<sup>lo</sup>  
251 exacerbations. These groups were not related to any technical variables measured in the  
252 study (Table S10). There was also no difference in season of recruitment, the detection of  
253 viral or bacterial pathogens, or the use of medications (Table 2). The prevalence of atopy,  
254 including allergy to aeroallergens, was higher in IRF7<sup>hi</sup> exacerbations (76.9% and 73.1%,  
255 respectively) compared with IRF7<sup>lo</sup> exacerbations (42.1% and 31.6%,  $p = 0.029$  and  $0.008$ ,



256 respectively). Children with IRF7<sup>lo</sup> exacerbations presented to hospital much later after  
257 initial symptoms (4.74 (SD 4.03) days) than IRF7<sup>hi</sup> exacerbations (2.31 (SD 1.98) days,  $p =$   
258 0.011). This was also reflected in the duration of cough prior to hospitalization (IRF7<sup>lo</sup>: 5.62  
259 (SD 3.20) days and IRF7<sup>hi</sup>: 1.96 (SD 1.51) days, respectively,  $p = 0.000027$ ). Children with  
260 IRF7<sup>lo</sup> exacerbations were at least 4.6 times more likely to be admitted to hospital compared  
261 with IRF7<sup>hi</sup> exacerbations (OR 4.65,  $p = 0.018$ ). Time to subsequent first  
262 representation/admission to hospital with an exacerbation was shorter in IRF7<sup>lo</sup>  
263 exacerbations compared with IRF7<sup>hi</sup> exacerbations (Table 2, Fig S5). Within the first year of  
264 follow-up, more children with IRF7<sup>lo</sup> (68.4%) represented/readmitted to hospital with a  
265 respiratory exacerbation compared to those with IRF7<sup>hi</sup> (30.8%,  $p = 0.017$ ). All associations  
266 remained significant after adjustment for age, gender, aeroallergen allergy and Caucasian  
267 ethnicity.

268

269 *Replication of IRF7<sup>hi</sup> and IRF7<sup>low</sup> exacerbation responses in an independent sample of*  
270 *children*

271

272 To determine if IRF7<sup>hi</sup> and IRF7<sup>lo</sup> exacerbation phenotypes and their clinical correlates could  
273 be found in another group of children, RT-qPCR was employed to measure gene expression  
274 patterns in nasal swab samples from an independent sample of children. To select a panel of  
275 genes for RT-qPCR analysis, we focused on genes that were representative of IRF7<sup>hi</sup>  
276 exacerbations (DDX60, IFNL1, IRF7, ISG15, Mx1, RSAD2, and the downregulated gene IL-33,  
277 Figure 4), IRF7<sup>lo</sup> exacerbations (NCR1, THBS1, Figure 4), or that were common to both  
278 phenotypes (ARG1, CD163, FCER1G, IL-1R2, IL-18R1, TLR2, Figure 4). The RT-qPCR data was  
279 normalised to three endogenous control genes (HMBS, PPIA, PPIB), creating three separate  
280 variables for each gene, which were utilised for consensus clustering. The analysis  
281 segregated the subjects into five clusters (Figure 5); three of these had elevated expression  
282 of IRF7/interferon responses (combined as IRF7<sup>hi</sup>; black dendrogram in Figure 5), and the  
283 remaining two clusters had low IRF7/interferon responses (IRF7<sup>low1</sup> and IRF7<sup>low2</sup>; red and  
284 green dendrograms respectively in Figure 5). A longer time lag was observed from first  
285 symptoms to hospital presentation in the IRF7<sup>low1</sup> subjects (3.90 (SD 4.59) days) compared  
286 with the IRF7<sup>hi</sup> group (2.20 (SD 1.76) days,  $p = 0.023$ ). These symptoms included cough  
287 ( $p=0.015$ ), wheeze ( $p=0.022$ ) and shortness of breath ( $p = 0.02$ ). Fever was more prevalent

288 in the IRF7<sup>hi</sup> group (59.2%) compared with the IRF7<sup>low1</sup> and IRF7<sup>low2</sup> groups (24.1%,  $p = 0.004$   
289 and 10.0%,  $p < 0.001$ , respectively). Runny nose was also more prevalent in the IRF7<sup>hi</sup> group  
290 (75.5%) compared to the IRF7<sup>low2</sup> group (45.0%,  $p = 0.024$ ). All associations remained  
291 significant after adjusting for age, gender, aeroallergy and Caucasian ethnicity.

292

293

## 294 **Discussion**

295

296 Our study is the first to investigate acute wheeze/asthma exacerbation phenotypes in  
297 children using a systems biology approach. We have confirmed the central role of IRF7 as a  
298 gene network hub and have identified two distinct IRF7 molecular phenotypes, IRF7<sup>hi</sup>  
299 exhibiting robust upregulation of the Th1/type I interferon response and IRF7<sup>lo</sup> with an  
300 alternative activation signature marked by upregulation of cytokine and growth factor  
301 signalling and downregulation of interferon gamma. Importantly, the two phenotypes also  
302 produced distinct clinical phenotypes. Compared with children with IRF7<sup>hi</sup>, those with IRF7<sup>lo</sup>  
303 had a slower progression of illness from initial symptoms to hospital presentation, a greater  
304 likelihood of a hospital admission, and a greater chance of representation with a further  
305 exacerbation. Exacerbation severity at presentation was not different between the two IRF7  
306 patterns, perhaps because presentation to hospital is likely to be determined by symptoms  
307 reaching a severity threshold that causes parental concern. However also worth noting is  
308 that the apparently impaired IRF7 response in IRF7<sup>lo</sup> children was not associated with an  
309 increase in exacerbation severity at presentation, although perhaps expectedly the reduced  
310 IRF7 response was associated with slower resolution of the episode. These findings were  
311 unaffected by the respiratory viruses or bacteria detected and medication use. Investigation  
312 of a replication cohort using RT-qPCR produced similar findings despite variations in the  
313 subject characteristics between the discovery and replication cohorts. In summary our  
314 findings reveal two distinct phenotypes with clear differences in gene regulation patterns,  
315 either upregulation of robust innate immune responses or cytokine and growth factor  
316 signalling, and associated differences in clinical characteristics.

317

318 Asthma and wheezing exacerbations are largely triggered by RV infections but the  
319 underlying mechanisms are not well understood.<sup>2</sup> Previous *in vitro* studies suggested that

320 RV-induced interferon responses were deficient in bronchial epithelial cells from subjects  
321 with asthma, resulting in increased viral loads and exaggerated secondary responses.<sup>3, 4, 35</sup>  
322 However, *in vivo* studies of immune response patterns in the airways of both children and  
323 adults with RV-induced exacerbations found that interferon responses were increased, not  
324 deficient.<sup>9-11, 36</sup> Moreover, a clinical trial that evaluated the utility of inhaled interferon beta  
325 therapy in adults at the first signs of a cold to prevent worsening of their asthma symptoms  
326 failed to achieve its primary endpoint.<sup>37</sup> Our data extend these previous findings by  
327 demonstrating that wheezing exacerbations in children are heterogeneous and  
328 characterised by two very different IRF7 molecular phenotypes. Upstream regulator analysis  
329 suggested that IRF7<sup>hi</sup> exacerbations were driven by upregulation of IFNL1, IRF7, and  
330 interferon alpha signalling. In contrast, IRF7<sup>lo</sup> exacerbations were putatively driven by  
331 upregulation of cytokine and growth factor signalling (i.e. IL-6, IL-10, TGFb, CSF3, EGF) and  
332 downregulation of interferon gamma.

333

334 IRF7 is a master regulator of type I and type III interferon gene expression.<sup>32, 38-40</sup> We  
335 previously reported that IRF7 gene networks were upregulated in nasal wash samples from  
336 asthmatic children experiencing mild-to-moderate viral exacerbations.<sup>10</sup> We have also  
337 shown that IRF7 promotes RV-induced innate antiviral responses and limits IL-33 mRNA  
338 expression in cultured bronchial epithelial cells,<sup>33</sup> and furthermore in our current study IL-33  
339 was downregulated in IRF7<sup>hi</sup> exacerbation responses. Girkin *et al.* reported that knockdown  
340 of IRF7 abolished RV-induced type I interferon responses in the airways in a mouse model.<sup>40</sup>  
341 Together, these experimental findings support our computational analysis unveiling IRF7 as  
342 a regulator of the gene networks underlying the IRF7<sup>hi</sup> responder phenotype.

343

344 Children with IRF7<sup>lo</sup> exacerbations in the discovery cohort exhibited a delayed progression  
345 from first symptom onset to hospital presentation. Given that our study design entailed  
346 recruitment of children at ED presentation, we could not determine if IRF7 gene networks  
347 were initially upregulated closer to the onset of infection and subsequently waned, or  
348 alternatively if they were never upregulated in the first place. To address this issue, an  
349 alternative study design would be required which entails regular sampling of exacerbation-  
350 prone children during the RV season.<sup>41</sup> It would also be of interest to further study the  
351 stability of these identified phenotypes to learn if subjects experience the same type of

352 response over multiple wheezing exacerbation events or not. Notwithstanding this, our  
353 replication cohort comprised approximately twice as many cases as the discovery cohort,  
354 and this larger sample enabled the identification and characterization of two subgroups of  
355 IRF7<sup>lo</sup> children, and only one of these subgroups was characterized by delayed progression.  
356 The activation of growth factor signalling pathways and downregulation of interferon  
357 gamma may reflect the immune response entering a resolution phase, however, at the  
358 same time these children were symptomatic. Moreover, many were also RV positive, and  
359 given that TGF $\beta$  signalling promotes rhinovirus replication, upregulation of this pathway  
360 may prolong infection and delay viral clearance.<sup>42, 43</sup> It is also known that frequent severe  
361 exacerbations are associated with deficits in lung function growth (children) and accelerated  
362 lung function decline (adults).<sup>44</sup> Thus repeated cycles of inflammation, growth factor  
363 signalling and repair may alter the structure and function of the airways underlying this  
364 phenotype.

365

366 The mechanisms that determine expression of disease symptoms amongst children with  
367 IRF7<sup>hi</sup> and IRF7<sup>lo</sup> exacerbations are unknown. Given that children with IRF7<sup>hi</sup> exacerbations  
368 elicit robust antiviral responses, one possibility is that the airways of these children are  
369 sensitive to the host response to respiratory viruses. In this regard, several pathways  
370 associated with the IRF7<sup>hi</sup> phenotype are known to impact on respiratory function. PD-L1  
371 (encoded by CD274) is an immune checkpoint that delivers an inhibitory signal for T cell  
372 activation. Upregulation of PD-L1 during respiratory bacterial infections in early life  
373 suppresses the IL-13 decoy receptor IL-13Ra2, resulting in persistent airways  
374 hyperresponsiveness.<sup>45</sup> MDA5 (encoded by IFIH1) is a pattern recognition receptor that  
375 senses RV-derived RNA. MDA5 deficient mice infected with RV have delayed type I  
376 interferon responses, impaired type III interferon responses, and reduced airways  
377 hyperresponsiveness.<sup>46</sup> The proinflammatory effectors TNF, IFN $\gamma$ , and interferon gamma-  
378 induced protein 10 can also promote airway hyper-responsiveness in animal models.<sup>47-49</sup>

379

380 Another possibility is that IRF7<sup>hi</sup> and IRF7<sup>lo</sup> exacerbation responses converge on a final  
381 common pathway to precipitate respiratory symptoms (Figure 4). For example, CD38 is a  
382 receptor with enzymatic activity, which hydrolyses NAD, generating reaction products that  
383 modulate calcium signalling. It is expressed on immune and airway smooth muscle cells, and

384 it plays a dual role in asthma by enhancing airways inflammation and contractile responses  
385 in smooth muscle.<sup>50</sup> FCER1G is a component of the high affinity IgE receptor. Anti-IgE  
386 therapy neutralises serum IgE, reduces the expression of the high affinity IgE receptor on  
387 dendritic cells and mast cells, and it also reduces the frequency of asthma exacerbations.<sup>51</sup>  
388 <sup>52</sup> Phospholipases A2 are involved in the generation of eicosanoids from arachidonic acid.  
389 Knock-in of human sPLA2 into mice enhances airways inflammation and airways  
390 hyperresponsiveness.<sup>53</sup> TLR2 is a pattern recognition receptor that acts as a sensor for RV  
391 capsid.<sup>54</sup> In a mouse model of combined RV and allergen exposure, TLR2 signaling in  
392 macrophages was required for induction of airways inflammation and airways  
393 hyperresponsiveness.<sup>55</sup> In summary, our data has identified multiple candidate pathways  
394 that link IRF7<sup>hi</sup> and IRF7<sup>lo</sup> exacerbation responses with expression of respiratory symptoms,  
395 and these pathways represent logical candidates for future drug development programs.

396

397 This study has limitations that should be acknowledged. The expression profiles were  
398 derived from nasal swab samples that comprised a mixed cell population. Follow-up studies  
399 employing focused analyses in individually isolated cell types or single cell transcriptomics  
400 will be required to dissect the role of specific subpopulations of cells in this disease. The  
401 study participants were sampled during natural exacerbations, and it is not possible to  
402 control for all of the variables that may potentially impact on the data (e.g. age, gender,  
403 ethnicity, natural allergen exposure, pathogen strains and combinations, medications). To  
404 address this issue, our analysis strategy employed surrogate variable analysis to  
405 systematically estimate and adjust the analysis for all sources of hidden biological and/or  
406 technical variation. Some of the clinical characteristics associated with IRF7 phenotypes in  
407 the discovery cohort did not replicate in the validation cohort. This may be due in part to  
408 variations in the demographics and clinical characteristics between the two cohorts, as well  
409 as the fact that IRF7 phenotypes were defined in the discovery cohort by microarray analysis  
410 of a large number of genes, whereas in the validation cohort it was based on RT-qPCR  
411 analysis of a restricted gene panel. Finally, while our analyses have characterised gene  
412 network patterns underlying exacerbation phenotypes and unveiled candidate molecular  
413 drivers of the responses, further studies will be required to dissect the mechanisms that give  
414 rise to these phenotypes and drive the expression of respiratory symptoms.  
415 Notwithstanding these limitations, our findings demonstrate that exacerbation responses in

416 children are heterogeneous and comprise IRF7<sup>hi</sup> versus IRF7<sup>lo</sup> molecular phenotypes that  
417 determine clinical phenotypes. Future clinical trials targeting the interferon system in this  
418 disease should be stratified on the basis of these IRF7 phenotypes.

419

#### 420 **Author Contributions**

421 Conception and design of the study: PNS, IAL, AB; Acquisition of data: SKK, KF, JB, NT, FP, JE,  
422 SO, MB; Data analysis and interpretation: SKK, JR, GZ, LC, CM, LO, NT, RM, PNS, IAL, AB;  
423 Drafting the manuscript for important intellectual content: SKK, PNS, IAL, AB; all authors  
424 reviewed and approved the final manuscript.

425

#### 426 **Acknowledgements**

427 We thank all the children and their families who agreed to take part in the study. The study  
428 was funded by National Health and Medical Research Council (NHMRC APP1045760) and  
429 AstraZeneca. JB was funded by a Thoracic Society of Australia and New Zealand/AstraZeneca  
430 Respiratory Research Fellowship. LC is a recipient of the Asthma Foundation Fiona Staniforth  
431 and Australian Government Research Training Program Scholarships. NT is funded by the  
432 Mickey Hardy Asthma Australia National Scholarship. AB is supported by Fellowships from  
433 the Simon Lee Foundation and the Brightspark and McCusker Foundations.

434

#### 435 **References**

436

- 437 1. Coleman L, Laing IA, Bosco A. Rhinovirus-induced asthma exacerbations and risk  
438 populations. *Curr Opin Allergy Clin Immunol* 2016.
- 439 2. Bizzintino J, Lee WM, Laing IA, Vang F, Pappas T, Zhang G, et al. Association between  
440 human rhinovirus C and severity of acute asthma in children. *Eur Respir J* 2011;  
441 37:1037-42.
- 442 3. Wark PA, Johnston SL, Bucchieri F, Powell R, Puddicombe S, Laza-Stanca V, et al.  
443 Asthmatic bronchial epithelial cells have a deficient innate immune response to  
444 infection with rhinovirus. *The Journal of experimental medicine* 2005; 201:937-47.
- 445 4. Contoli M, Message SD, Laza-Stanca V, Edwards MR, Wark PA, Bartlett NW, et al.  
446 Role of deficient type III interferon-lambda production in asthma exacerbations.  
447 *Nature medicine* 2006; 12:1023-6.
- 448 5. Ritchie AI, Farne HA, Singanayagam A, Jackson DJ, Mallia P, Johnston SL.  
449 Pathogenesis of Viral Infection in Exacerbations of Airway Disease. *Ann Am Thorac*  
450 *Soc* 2015; 12 Suppl 2:S115-32.
- 451 6. Beale J, Jayaraman A, Jackson DJ, Macintyre JD, Edwards MR, Walton RP, et al.  
452 Rhinovirus-induced IL-25 in asthma exacerbation drives type 2 immunity and allergic  
453 pulmonary inflammation. *Sci Transl Med* 2014; 6:256ra134.
- 454 7. Jackson DJ, Makrinioti H, Rana BM, Shamji BW, Trujillo-Torralbo MB, Footitt J, et al.  
455 IL-33-Dependent Type 2 Inflammation during Rhinovirus-induced Asthma  
456 Exacerbations In Vivo. *Am J Respir Crit Care Med* 2014; 190:1373-82.

- 457 8. Murray CS, Poletti G, Keadze T, Morris J, Woodcock A, Johnston SL, et al. Study of  
458 modifiable risk factors for asthma exacerbations: virus infection and allergen  
459 exposure increase the risk of asthma hospital admissions in children. *Thorax* 2006;  
460 61:376-82.
- 461 9. Bosco A, Ehteshami S, Stern DA, Martinez FD. Decreased activation of inflammatory  
462 networks during acute asthma exacerbations is associated with chronic airflow  
463 obstruction. *Mucosal immunology* 2010; 3:399-409.
- 464 10. Bosco A, Ehteshami S, Panyala S, Martinez FD. Interferon regulatory factor 7 is a  
465 major hub connecting interferon-mediated responses in virus-induced asthma  
466 exacerbations in vivo. *The Journal of allergy and clinical immunology* 2012; 129:88-  
467 94.
- 468 11. Miller EK, Hernandez JZ, Wimmenauer V, Shepherd BE, Hijano D, Libster R, et al. A  
469 mechanistic role for type III IFN-lambda1 in asthma exacerbations mediated by  
470 human rhinoviruses. *American journal of respiratory and critical care medicine* 2012;  
471 185:508-16.
- 472 12. Qureshi F, Pestian J, Davis P, Zaritsky A. Effect of nebulized ipratropium on the  
473 hospitalization rates of children with asthma. *N Engl J Med.* 1998; 339:1030-5.
- 474 13. Bentur L, Canny GJ, Shields MD, Kerem E, Schuh S, Reisman JJ, et al. Controlled trial  
475 of nebulized albuterol in children younger than 2 years of age with acute asthma.  
476 *Pediatrics* 1992; 89:133-7.
- 477 14. Chidlow GR, Harnett GB, Shellam GR, Smith DW. An economical tandem multiplex  
478 real-time PCR technique for the detection of a comprehensive range of respiratory  
479 pathogens. *Viruses* 2009; 1:42-56.
- 480 15. Lee WM, Lemanske RF, Jr., Evans MD, Vang F, Pappas T, Gangnon R, et al. Human  
481 rhinovirus species and season of infection determine illness severity. *Am J Respir Crit*  
482 *Care Med* 2012; 186:886-91.
- 483 16. Bochkov YA, Grindle K, Vang F, Evans MD, Gern JE. Improved molecular typing assay  
484 for rhinovirus species A, B, and C. *J Clin Microbiol* 2014; 52:2461-71.
- 485 17. Irizarry RA, Hobbs B, Collin F, Beazer-Barclay YD, Antonellis KJ, Scherf U, et al.  
486 Exploration, normalization, and summaries of high density oligonucleotide array  
487 probe level data. *Biostatistics* 2003; 4:249-64.
- 488 18. Dai M, Wang P, Boyd AD, Kostov G, Athey B, Jones EG, et al. Evolving gene/transcript  
489 definitions significantly alter the interpretation of GeneChip data. *Nucleic acids*  
490 *research* 2005; 33:e175.
- 491 19. Kauffmann A, Gentleman R, Huber W. *arrayQualityMetrics*--a bioconductor package  
492 for quality assessment of microarray data. *Bioinformatics* 2009; 25:415-6.
- 493 20. McCall MN, Murakami PN, Lukk M, Huber W, Irizarry RA. Assessing affymetrix  
494 GeneChip microarray quality. *BMC bioinformatics* 2011; 12:137.
- 495 21. Smyth GK. *limma: Linear Models for Microarray Data*. In: Gentleman R, Carey VJ,  
496 Huber W, Irizarry RA, Dudoit S, editors. *Bioinformatics and Computational Biology*  
497 *Solutions Using R and Bioconductor*. New York, NY: Springer New York; 2005. p. 397-  
498 420.
- 499 22. Leek JT, Storey JD. Capturing heterogeneity in gene expression studies by surrogate  
500 variable analysis. *PLoS Genet* 2007; 3:1724-35.
- 501 23. Lu J, Kerns RT, Peddada SD, Bushel PR. Principal component analysis-based filtering  
502 improves detection for Affymetrix gene expression arrays. *Nucleic Acids Res* 2011;  
503 39:e86.

- 504 24. Wilkerson MD, Hayes DN. ConsensusClusterPlus: a class discovery tool with  
505 confidence assessments and item tracking. *Bioinformatics* 2010; 26:1572-3.
- 506 25. Jacob L, Gagnon-Bartsch JA, Speed TP. Correcting gene expression data when neither  
507 the unwanted variation nor the factor of interest are observed. *Biostatistics* 2016;  
508 17:16-28.
- 509 26. Freytag S, Gagnon-Bartsch J, Speed TP, Bahlo M. Systematic noise degrades gene co-  
510 expression signals but can be corrected. *BMC Bioinformatics* 2015; 16:309.
- 511 27. Chen EY, Tan CM, Kou Y, Duan Q, Wang Z, Meirelles GV, et al. Enrichr: interactive and  
512 collaborative HTML5 gene list enrichment analysis tool. *BMC Bioinformatics* 2013;  
513 14:128.
- 514 28. Kramer A, Green J, Pollard J, Jr., Tugendreich S. Causal analysis approaches in  
515 Ingenuity Pathway Analysis. *Bioinformatics* 2014; 30:523-30.
- 516 29. Aran D, Hu Z, Butte AJ. xCell: Digitally portraying the tissue cellular heterogeneity  
517 landscape. *bioRxiv* 2017.
- 518 30. Spandidos A, Wang X, Wang H, Seed B. PrimerBank: a resource of human and mouse  
519 PCR primer pairs for gene expression detection and quantification. *Nucleic Acids Res*  
520 2010; 38:D792-9.
- 521 31. Newman AM, Liu CL, Green MR, Gentles AJ, Feng W, Xu Y, et al. Robust enumeration  
522 of cell subsets from tissue expression profiles. *Nat Methods* 2015; 12:453-7.
- 523 32. Honda K, Yanai H, Negishi H, Asagiri M, Sato M, Mizutani T, et al. IRF-7 is the master  
524 regulator of type-I interferon-dependent immune responses. *Nature* 2005; 434:772-  
525 7.
- 526 33. Bosco A, Wiehler S, Proud D. Interferon regulatory factor 7 regulates airway  
527 epithelial cell responses to human rhinovirus infection. *BMC Genomics* 2016; 17:76.
- 528 34. Becker KG, Hosack DA, Dennis G, Jr., Lempicki RA, Bright TJ, Cheadle C, et al.  
529 PubMatrix: a tool for multiplex literature mining. *BMC Bioinformatics* 2003; 4:61.
- 530 35. Baraldo S, Contoli M, Bazzan E, Turato G, Padovani A, Marku B, et al. Deficient  
531 antiviral immune responses in childhood: Distinct roles of atopy and asthma. *The*  
532 *Journal of allergy and clinical immunology* 2012; 130:1307-14.
- 533 36. Hansel TT, Tunstall T, Trujillo-Torralbo MB, Shamji B, Del-Rosario A, Dhariwal J, et al.  
534 A Comprehensive Evaluation of Nasal and Bronchial Cytokines and Chemokines  
535 Following Experimental Rhinovirus Infection in Allergic Asthma: Increased  
536 Interferons (IFN-gamma and IFN-lambda) and Type 2 Inflammation (IL-5 and IL-13).  
537 *EBioMedicine* 2017; 19:128-38.
- 538 37. Djukanovic R, Harrison T, Johnston SL, Gabbay F, Wark P, Thomson NC, et al. The  
539 effect of inhaled IFN-beta on worsening of asthma symptoms caused by viral  
540 infections. A randomized trial. *Am J Respir Crit Care Med* 2014; 190:145-54.
- 541 38. Osterlund PI, Pietila TE, Veckman V, Kotenko SV, Julkunen I. IFN regulatory factor  
542 family members differentially regulate the expression of type III IFN (IFN-lambda)  
543 genes. *Journal of immunology* 2007; 179:3434-42.
- 544 39. Ciancanelli MJ, Huang SX, Luthra P, Garner H, Itan Y, Volpi S, et al. Infectious disease.  
545 Life-threatening influenza and impaired interferon amplification in human IRF7  
546 deficiency. *Science* 2015; 348:448-53.
- 547 40. Girkin J, Hatchwell L, Foster P, Johnston SL, Bartlett N, Collison A, et al. CCL7 and IRF-  
548 7 Mediate Hallmark Inflammatory and IFN Responses following Rhinovirus 1B  
549 Infection. *J Immunol* 2015; 194:4924-30.



- 550 41. Olenec JP, Kim WK, Lee WM, Vang F, Pappas TE, Salazar LE, et al. Weekly monitoring  
551 of children with asthma for infections and illness during common cold seasons. *The*  
552 *Journal of allergy and clinical immunology* 2010; 125:1001-6 e1.
- 553 42. Baines KJ, Simpson JL, Wood LG, Scott RJ, Gibson PG. Transcriptional phenotypes of  
554 asthma defined by gene expression profiling of induced sputum samples. *The Journal*  
555 *of allergy and clinical immunology* 2011; 127:153-60, 60 e1-9.
- 556 43. Bedke N, Sammut D, Green B, Kehagia V, Dennison P, Jenkins G, et al. Transforming  
557 growth factor-beta promotes rhinovirus replication in bronchial epithelial cells by  
558 suppressing the innate immune response. *PLoS One* 2012; 7:e44580.
- 559 44. Dougherty RH, Fahy JV. Acute exacerbations of asthma: epidemiology, biology and  
560 the exacerbation-prone phenotype. *Clinical and experimental allergy : journal of the*  
561 *British Society for Allergy and Clinical Immunology* 2009; 39:193-202.
- 562 45. Starkey MR, Nguyen DH, Brown AC, Essilfie AT, Kim RY, Yagita H, et al. Programmed  
563 Death Ligand 1 Promotes Early-Life Chlamydia Respiratory Infection-Induced Severe  
564 Allergic Airway Disease. *Am J Respir Cell Mol Biol* 2016; 54:493-503.
- 565 46. Wang Q, Miller DJ, Bowman ER, Nagarkar DR, Schneider D, Zhao Y, et al. MDA5 and  
566 TLR3 initiate pro-inflammatory signaling pathways leading to rhinovirus-induced  
567 airways inflammation and hyperresponsiveness. *PLoS pathogens* 2011; 7:e1002070.
- 568 47. Choi IW, Sun K, Kim YS, Ko HM, Im SY, Kim JH, et al. TNF-alpha induces the late-phase  
569 airway hyperresponsiveness and airway inflammation through cytosolic  
570 phospholipase A(2) activation. *J Allergy Clin Immunol* 2005; 116:537-43.
- 571 48. Kanda A, Driss V, Hornez N, Abdallah M, Roumier T, Abboud G, et al. Eosinophil-  
572 derived IFN-gamma induces airway hyperresponsiveness and lung inflammation in  
573 the absence of lymphocytes. *J Allergy Clin Immunol* 2009; 124:573-82, 82 e1-9.
- 574 49. Medoff BD, Sauty A, Tager AM, Maclean JA, Smith RN, Mathew A, et al. IFN-gamma-  
575 inducible protein 10 (CXCL10) contributes to airway hyperreactivity and airway  
576 inflammation in a mouse model of asthma. *J Immunol* 2002; 168:5278-86.
- 577 50. Gally F, Hartney JM, Janssen WJ, Perraud AL. CD38 plays a dual role in allergen-  
578 induced airway hyperresponsiveness. *Am J Respir Cell Mol Biol* 2009; 40:433-42.
- 579 51. Prussin C, Griffith DT, Boesel KM, Lin H, Foster B, Casale TB. Omalizumab treatment  
580 downregulates dendritic cell FcepsilonRI expression. *J Allergy Clin Immunol* 2003;  
581 112:1147-54.
- 582 52. Busse WW, Morgan WJ, Gergen PJ, Mitchell HE, Gern JE, Liu AH, et al. Randomized  
583 trial of omalizumab (anti-IgE) for asthma in inner-city children. *The New England*  
584 *journal of medicine* 2011; 364:1005-15.
- 585 53. Henderson WR, Jr., Oslund RC, Bollinger JG, Ye X, Tien YT, Xue J, et al. Blockade of  
586 human group X secreted phospholipase A2 (GX-sPLA2)-induced airway inflammation  
587 and hyperresponsiveness in a mouse asthma model by a selective GX-sPLA2  
588 inhibitor. *J Biol Chem* 2011; 286:28049-55.
- 589 54. Triantafilou K, Vakakis E, Richer EA, Evans GL, Villiers JP, Triantafilou M. Human  
590 rhinovirus recognition in non-immune cells is mediated by Toll-like receptors and  
591 MDA-5, which trigger a synergetic pro-inflammatory immune response. *Virulence*  
592 2011; 2:22-9.
- 593 55. Han M, Chung Y, Young Hong J, Rajput C, Lei J, Hinde JL, et al. Toll-like receptor 2-  
594 expressing macrophages are required and sufficient for rhinovirus-induced airway  
595 inflammation. *J Allergy Clin Immunol* 2016; 138:1619-30.
- 596

597 **Figure Titles and Legends**

598

599 **Figure 1. Computational inference of the cellular composition of the nasal swab samples.**

600 **A)** Relative proportions of 12 major cell types across the cohort. **B)** Relative proportions of  
601 individual cell types stratified according to RV status (RV+, RV-) within wheeze (Whz),  
602 convalescent (Conv) and control (Ctrl) subjects. **C)** Relationship between cell type  
603 proportions and clinical traits. Proportions were determined by computational  
604 deconvolution. Boxplots show IQR fenced using the Turkey method. Significant two-way  
605 Kruskal-Wallis P values are shown in italics. \* represents a Mann-Whitney P value < 0.05, \*\*  
606 < 0.01, \*\*\* < 0.001, and \*\*\*\* < 0.0001.

607

608 **Figure 2. Discovery of IRF7 molecular phenotypes. A)** Consensus hierarchical clustering was  
609 performed on gene expression profiles derived from nasal swab samples. Five clusters of  
610 subjects (S1-S5) and genes (G1-G5) were identified. **B)** The expression profiles of each gene  
611 cluster were summarized by principal components analysis, and the first principal  
612 component of each gene cluster was plotted across the subjects stratified by their cluster  
613 membership. **C)** Experimentally supported findings from published studies (prior  
614 knowledge) were employed to reconstruct the wiring diagram of the gene networks for  
615 each gene cluster. Genes colored red were upregulated and those colored green were  
616 downregulated in subjects from cluster S1 versus S2. Solid/dashed lines indicate  
617 direct/indirect functional relationships between genes. Larger nodes have more  
618 connections.

619

620 **Figure 3. Identification of network hubs and driver genes underlying IRF7hi and IRF7lo**

621 **exacerbations. A)** Differentially expressed genes were identified by comparing children with  
622 IRF7hi exacerbations (left panel) or IRF7lo exacerbations (right panel) with RV negative  
623 controls. Data are presented as volcano plots, and the dashed horizontal line represents FDR  
624 = 0.05. **B)** The gene networks underlying IRF7hi exacerbations (left panel) or IRF7lo  
625 exacerbations (right panel) were reconstructed employing prior knowledge. Genes colored  
626 red were upregulated and genes colored green were downregulated. Larger nodes have  
627 more connections. **C)** Upstream regulator analysis was employed to infer molecular drivers  
628 of IRF7hi (left panel) and IRF7lo (right panel) exacerbations. The drivers were ranked by –

629 Log10 overlap p-value or activation Z-score. Red bars indicate pathway activation (activation  
630 Z-score greater than 2.0) and blue bars indicate pathway inhibition (activation Z-score less  
631 than -2.0). White bars indicate pathways with non-significant activation Z-scores (i.e.  
632 absolute Z-scores less than 2.0).

633

634 **Figure 4: IRF7hi and IRF7lo exacerbation phenotypes operate through discrete and**  
635 **overlapping pathways.** Gene networks associated with IRF7hi exacerbations (left side),  
636 IRF7lo exacerbations (right side), or common to both responses (middle). Genes are  
637 organised by subcellular location. Genes colored red were upregulated and those colored  
638 green were downregulated relative to RV negative controls.

639

640

641 **Figure 5. Identification of IRF7hi and IRF7lo exacerbations phenotypes in an independent**  
642 **cohort of children.** Gene expression patterns were profiled by RT-qPCR in nasal swab  
643 samples collected from children with an asthma/wheezing exacerbation (red columns) or  
644 healthy controls (black columns). The RT-qPCR data was normalised separately to three  
645 independent endogenous reference genes, resulting in three variables for each target gene,  
646 and then analysed by consensus hierarchical cluster analysis. The dendrogram is colored by  
647 phenotype (IRF7hi = black, IRF7low1 green, IRF7low1 red).

648

#### 649 **Figure Titles**

650 Table 1. Characteristics of the study population.

651

652 Table 2. Characteristics of the IRF7hi and IRF7lo phenotypes in the discovery and replication  
653 cohorts.

654

655

#### 656 **Method**

657

##### 658 *Study Participants*

659 The participants were part of an ongoing study examining the mechanisms of acute viral  
660 respiratory infection in children (MAVRIC). Cases were children aged 0-16 years presenting

661 to the ED of a tertiary children's hospital (Princess Margaret Hospital, Perth, Western  
662 Australia) with acute wheeze and the availability of nasal fluid and swab specimens. All  
663 respiratory diagnoses were determined by the treating physician and were independent of  
664 study staff. Controls consisted of siblings of the cases or randomly selected children from  
665 the community. We defined 'admission to hospital' as admission to a non-ED hospital ward.  
666 We also collected 19 convalescent/quiescent nasal samples from children who were  
667 followed-up at least 6 weeks after an acute exacerbation of asthma or wheeze; only a  
668 subset of these samples (5/19) were paired with acute samples. The hospital's Human Ethics  
669 Committee approved the study (MAVRIC approval 1761 EP) and parental/guardian written  
670 informed consent was obtained prior to recruitment. An independent sample of children  
671 from within the MAVRIC cohort was used as a validation cohort.

672

#### 673 *Data and sample collection*

674 A detailed questionnaire and medical records were used to provide demographic and  
675 medical information for each participant during recruitment and follow-up. A child was  
676 considered positive for aeroallergy if they had a positive response to either (1) the skin prick  
677 test completed on 9 allergens (rye grass, mixed grasses, dog, cat, cockroach, *Alternaria*  
678 *tenuis*, *Aspergillus fumigatus*, *Dermatophagoides farinae*, *D. pteronyssinus*), or (2) a positive  
679 specific IgE to either cat or house dust mite ( $>0.35\text{kU/L}$ ) at either the acute or convalescent  
680 visit, or positive answers to the acute questionnaire for the questions "Does your child  
681 suffer from hayfever?", or "Does your child suffer from allergies to: (a) grasses/pollens?; or  
682 (b) dust mite?". A child was considered positive for allergy overall if they had (1) aeroallergy;  
683 or (2) a positive response to the skin prick tests for either cows' milk or egg white, or (3) a  
684 parental report of a history of anaphylaxis, or (4) a high total IgE at either the acute or  
685 convalescent visit.

686

687 Acute asthma severity scores were assigned to each child at recruitment using a modified  
688 National Institute of Health score for children over 2 years of age<sup>12</sup> and included  
689 assessments of respiratory rate appropriate for age, oxygen saturation, auscultation,  
690 retractions and dyspnea. A separate, age-appropriate severity score was used for children  
691 aged under 2 years<sup>13</sup> with assessments of heart rate, respiratory rate, wheezing and

692 accessory muscle use. Separate severity Z scores were calculated for each child within each  
693 of the two age groups to provide standardized scores across the whole cohort.

694

695 The time to next re-presentation or admission to a public hospital in Western Australian  
696 with any acute respiratory illness for each child, within the first and second year of  
697 observation, was obtained from the state hospital database retrospectively.

698

699 A nasal secretion sample from each participant was collected to test for the presence of  
700 respiratory viruses and bacteria. Nasal swab specimens were obtained from each child using  
701 flocked swabs (Copan, Italy) and were taken immediately to the laboratory for processing  
702 for gene expression profiling.

703

#### 704 *Virus and bacteria detection*

705 Common respiratory pathogens (adenovirus, respiratory syncytial virus (RSV) types A and B,  
706 bocavirus, coronavirus, parainfluenza viruses 1-4, influenza viruses A, B and C,  
707 metapneumovirus, *Bordetella* species, *Mycoplasma pneumoniae*, *Chlamydomphila*  
708 *pneumoniae*, *Haemophilus influenzae*, *Pneumocystis jirovecii*, *Staphylococcus aureus*,  
709 *Streptococcus Pneumoniae* and *pyogenes*) were identified using a tandem multiplex real-  
710 time PCR assay as previously described.<sup>14</sup> Rhinovirus (RV) was detected and genotyped by a  
711 molecular method as previously described.<sup>15, 16</sup>

712

#### 713 *Microarray analysis of gene expression*

714 Total RNA was extracted from nasal swabs using TRIzol (Invitrogen) followed by RNeasy  
715 MinElute (QIAGEN).<sup>10</sup> The quality and integrity of the RNA was analysed on the nanodrop  
716 and bioanalyzer (Agilent). Total RNA samples were shipped on dry ice to the Ramaciotti  
717 Centre for Genomics, at the University of New South Wales, Sydney, for processing and  
718 hybridization to Human Gene 2.1 ST microarrays (Affymetrix). The raw microarray data are  
719 available from the gene expression omnibus repository (accession: GSE103166).

720

#### 721 *Microarray data analysis*

722 The microarray data was preprocessed in R employing the Robust Multi-Array (RMA)  
723 algorithm.<sup>17</sup> A custom chip description file (hugene21sthsentrezg; version 20) was utilized to

724 map probe sets to genes.<sup>18</sup> The quality of the microarray data was assessed employing the R  
725 package `arrayQualityMetrics`. Low quality/outlying arrays were identified on the basis of  
726 Relative Log Expression (RLE) and Normalized Unscaled Standard Error (NUSE) metrics and  
727 removed from the analysis.<sup>19, 20</sup> Differentially expressed genes were identified using Linear  
728 Models for Microarray Data (LIMMA) in conjunction with Surrogate Variable Analysis  
729 (SVA).<sup>21, 22</sup> Limma entails fitting a linear model to the log expression intensities for each  
730 gene, and Empirical Bayes methods are employed to moderate the standard error estimates  
731 resulting in improved power and more stable inference.<sup>21</sup> Surrogate Variable Analysis  
732 estimates and captures all sources of hidden biological and/or technical variation that may  
733 potentially confound the analysis, and the estimated surrogate variables are added as  
734 covariates to the limma models. Where applicable, the correlation between paired samples  
735 was accounted for in the linear model fit through use of the `duplicateCorrelation` function.  
736 P-values derived from the limma models were adjusted for multiple testing employing the  
737 false discovery rate method.<sup>21</sup> Non-informative probe sets were identified using the  
738 proportion of variation accounted by the first principal component (PVAC) algorithm and  
739 filtered out of the results from the differential expression analysis.<sup>23</sup>

740

#### 741 *Discovery of molecular phenotypes*

742 Molecular phenotypes were identified using consensus hierarchical clustering.<sup>24</sup> This  
743 algorithm employs data resampling techniques to find consensus across thousands of runs  
744 of a cluster analysis.<sup>24</sup> Prior to cluster analysis, batch-like effects and other sources of  
745 unwanted variation were modelled and removed using the `RUVnormalize` algorithm.<sup>25</sup> This  
746 algorithm leverages a set of negative control genes that are not associated with the  
747 outcome of interest to model unwanted variation and regress it out of the data. To select  
748 negative control genes, genes associated with wheezing exacerbations were first identified  
749 in case/control comparisons between wheezing/convalescent or wheezing/control samples  
750 using LIMMA/SVA, and those genes with an adjusted p-value less than 0.2 for any  
751 comparison were excluded from control gene selection. Negative control genes (n=1000)  
752 were selected from the remaining genes using the `empNegativeControls` function from the  
753 `RUVcorr` package.<sup>26</sup> After removal of unwanted variation using the `RUVnormalize` algorithm,  
754 the gene expression data was converted to Z-scores, and consensus hierarchical clustering  
755 was performed using the set of genes that were associated with the outcome of interest

756 (adjusted p-value < 0.1). Hierarchical cluster analysis was performed using Pearson  
757 correlation and ward linkage.

758

#### 759 *Pathways analysis*

760 Pathways analysis was performed using Enrichr software and the Reactome database.<sup>27</sup>

761

#### 762 *Prior knowledge based reconstruction of gene networks*

763 Gene networks were constructed employing experimentally supported findings from  
764 published studies curated in the Ingenuity Systems Knowledge Base (Ingenuity Systems,  
765 Redwood City, California). Direct and indirect molecular relationships were considered from  
766 all available categories, including activation, inhibition, localisation, modification, molecular  
767 cleavage, phosphorylation, protein-DNA interaction, protein-protein interaction, regulation  
768 of binding, transcription, translation, and ubiquitination. The circular layout was employed  
769 to display the network graph object, and hubs were positioned at the centre of the network.  
770 The nodes were coloured based on the expression ratio; red nodes denote upregulated  
771 genes and green nodes denote downregulation.

772

#### 773 *Upstream regulator analysis*

774 Upstream regulator analysis (Ingenuity Systems, Redwood City, California) was employed to  
775 infer the molecular drivers of the observed differential gene expression patterns.<sup>28</sup> Two  
776 statistical metrics were calculated. The overlap p-value measures enrichment of known  
777 downstream target genes for a given upstream regulator amongst the differentially  
778 expressed genes. The activation Z-score is a measure of the pattern match between the  
779 direction of the observed gene expression changes (in terms of up/down regulation) and the  
780 predicted pattern based on prior experimental evidence. Pathways with an activation Z-  
781 score greater than 2.0 are predicted to be activated, and an activation Z-score less than -2.0  
782 indicates pathway inhibition. If the activation Z-score lies between -2.0 and 2.0, the  
783 activation state of the pathway cannot be predicted.

784

#### 785 *Estimation of cellular composition from gene expression profiles*

786 Cell type enrichment was examined in microarray-based gene expression profiles using the  
787 xCell webtool (University of California, San Francisco).<sup>29</sup> Gene signatures for 64 cell types

788 were determined from >1,800 transcriptomic profiles of purified cell samples allowing  
789 reliable enrichment analysis to investigate tissue heterogeneity. Cell types were chosen for  
790 further analysis based on their potential importance in the upper airways. Enrichment  
791 scores were converted to proportional cellular composition, allowed for by the linearity  
792 assumption, so that the sum of the proportions was equal to 1. Statistical comparisons were  
793 performed using nonparametric Kruskal-Wallis and Mann-Whitney U tests (GraphPad  
794 software [La Jolla, USA]).

795

#### 796 *RT-qPCR*

797 Total RNA extracted from nasal swab samples was reverse-transcribed into cDNA using the  
798 QuantiTect Reverse Transcription Kit (Qiagen). qPCR was performed using QuantiFast SYBR  
799 Green PCR Master Mix (Qiagen) on the ABI 7900HT Sequence Detection System (Life  
800 Technologies). Primer sequences were obtained from Primerbank<sup>30</sup> and purchased from  
801 Sigma. Standard curves were prepared from serially diluted RT-qPCR products. Melt-curve  
802 analysis was conducted for all samples to confirm the specificity of amplified products.  
803 Relative expression levels of target genes were calculated by normalization to the  
804 housekeeping genes *HMBS*, *PPIA* and *PPIB*.<sup>9</sup> The RT-qPCR was log<sub>2</sub> transformed, converted  
805 to Z-scores, and analyzed by consensus hierarchical clustering.

806

#### 807 *Statistical Analysis*

808 Comparisons of all categorical variables between the clusters were performed using  $\chi^2$  test  
809 while ANOVA was used for continuous variables. Kaplan-Meier survival curve was used to  
810 assess the time to first re-presentation or admission after recruitment. A p-value of less  
811 than 0.05 was considered significant. All analyses were performed using SPSS version 22  
812 (Chicago, Illinois).

813

#### 814 **Supplemental Information Titles and Legends**

815 **Figure S1: Identification of IRF7 molecular phenotypes by consensus clustering. A)** The  
816 empNegativeControls function from the R package RUVCorr was employed to identify a set  
817 of negative controls genes. The plot shows variability on the vertical axis (IQR) versus mean  
818 expression on the horizontal axis. The control genes are coloured red. **B)** The RUVnormalise  
819 algorithm was employed to model unwanted variation and regress it out of the data. The



820 pairwise correlation between samples was calculated before (left panel) and after (right  
821 panel) RUV normalisation. Variations in cellular composition resulted in strong correlation  
822 patterns between samples, and this correlation structure was removed by RUV  
823 normalisation. **C)** The consensus clustering algorithm calculates a metric called the  
824 Cumulative Distribution Function (CDF), which measures consensus across hundreds of  
825 different clustering runs for increasing numbers of “k” clusters. The number of clusters in  
826 the data is estimated by observing the point at which the CDF reaches a maximum (left  
827 plot), and/or as the relative change in area under the CDF curve stabilises (right panel). In  
828 this data set, the CDF did not reach a maximum value, but the rate of change of the area  
829 under the curve started to plateau at k=5 or k=6. **D)** The consensus cluster analysis result  
830 was plotted for k=5 (left panel) and k=6 (right panel). We selected k=5 because the clusters  
831 were more well defined.

832

833 **Figure S2: Computational inference of the cellular responses underlying IRF7hi and IRF7lo**  
834 **exacerbations.** Relative proportions of 13 major cell types in nasal swab samples collected  
835 from children with IRF7hi exacerbations, IRF7lo exacerbations, or from healthy controls.  
836 Boxplots showing IQR fenced using the Turkey method. Significant two-way Kruskal-Wallis P  
837 values are shown in italics. \* represents a Mann-Whitney P value < 0.05, \*\* < 0.01, \*\*\* <  
838 0.001, and \*\*\*\* < 0.0001.

839

840 **Figure S3: Computational inference of the cellular responses underlying IRF7hi and IRF7lo**  
841 **exacerbations stratified by RV detection.** Relative proportions of 13 major cell types in  
842 nasal swab samples collected from children with IRF7hi exacerbations, IRF7lo exacerbations,  
843 or from healthy controls. Boxplots showing IQR fenced using the Turkey method. Significant  
844 two-way Kruskal-Wallis P values are shown in italics. \* represents a Mann-Whitney P value <  
845 0.05, \*\* < 0.01, \*\*\* < 0.001, and \*\*\*\* < 0.0001.

846

847 **Figure S4: Time to next hospital presentation or admission for a respiratory illness**  
848 **comparing children in the discovery cohort with IRF7hi or IRF7lo exacerbations.** Kaplan  
849 Meier curve of the proportion of children that have a subsequent hospital  
850 presentation/admission for any respiratory diagnosis followed for a maximum of 3.55 years.

851 Censored data represents the length of time a child was followed and did not have another  
852 hospital presentation/admission for a respiratory illness.

853

854 **Table S1:** Differential gene expression in children with RV positive exacerbations vs RV  
855 negative controls.

856 **Table S2:** Differential gene expression in children with RV positive exacerbations vs RV  
857 negative convalescence.

858 **Table S3:** Differential gene expression in children with RV negative exacerbations vs RV  
859 negative controls.

860 **Table S4:** Differential gene expression in children with RV negative exacerbations vs RV  
861 negative convalescence.

862 **Table S5:** Differential gene expression in children with IRF7hi exacerbations vs RV negative  
863 controls.

864 **Table S6:** Differential gene expression in children with IRF7lo exacerbations vs RV negative  
865 controls.

866 **Table S7:** Molecular drivers of IRF7hi exacerbations.

867 **Table S8:** Molecular drivers of IRF7lo exacerbations.

868 **Table S9:** Pubmatrix results.

869 **Table S10:** Technical variables of samples in the IRF7hi and IRF7lo exacerbations.

870

Table 1: Characteristics of the study population.

| N                           | Discovery Cohort            |                      |                      |                    | Replication Cohort          |                             |                     |                       |
|-----------------------------|-----------------------------|----------------------|----------------------|--------------------|-----------------------------|-----------------------------|---------------------|-----------------------|
|                             | Wheezing Exacerbation<br>56 | Convalescence<br>19  | Controls<br>31       | Overall<br>p-value | Wheezing Exacerbation<br>99 | Discov vs Replic<br>p-value | Controls<br>12      | WE vs Ctrl<br>p-value |
| Age, mean (SD), yrs         | 4.35 (3.31)*                | 4.48 (1.62)          | 6.40 (4.41)          | <b>0.027</b>       | 5.47 (3.61)                 | 0.057                       | 3.47 (3.16)         | 0.07                  |
| Male Gender, n/N (%)        | 30/56 (53.6)                | 12/19 (63.2)         | 15/31 (48.4)         | 0.63               | 62/99 (62.6)                | 0.309                       | 4/12 (33.3)         | 0.053                 |
| Caucasian, n/N (%)          | 26/56 (46.4)*               | 13/19 (68.4)         | 22/28 (78.6)         | <b>0.012</b>       | 47/96 (49.0)                | 0.867                       | 8/8 (100)           | <b>0.006</b>          |
| Spring recruitment, n/N (%) | 6/56 (10.7)#                | 8/19 (42.1)          | 8/31 (25.8)          | <b>0.01</b>        | 27/99 (27.3)                | <b>0.015</b>                | 1/12 (8.3)          | 0.289                 |
| Autumn recruitment, n/N (%) | 6/56 (10.7)                 | 4/19 (21.1)          | 6/31 (19.4)          | 0.383              | 28/99 (28.3)                | <b>0.015</b>                | 5/12 (41.7)         | 0.336                 |
| Winter recruitment, n/N (%) | 44/56 (78.6)*#              | 7/19 (36.8)          | 17/31 (54.8)         | <b>0.002</b>       | 42/99 (42.4)                | <b>&lt;0.001</b>            | 6/12 (50.0)         | 0.76                  |
| Overall Allergy, n/N (%)    | 34/56 (60.7%)               | 7/11 (63.6)          | 18/28 (64.3%)        | 0.952              | 78/99 (78.8)                | <b>0.024</b>                | 4/12 (33.3)         | <b>0.002</b>          |
| AeroAllergy, n/N (%)        | 31/56 (55.4)                | 7/11 (63.6)          | 16/28 (57.1)         | 0.954              | 70/99 (70.7)                | 0.079                       | 3/12 (25.0)         | <b>0.003</b>          |
| <b>Pathogen Detection</b>   |                             |                      |                      |                    |                             |                             |                     |                       |
| Respiratory virus+, n/N (%) | 47/54 (87.0)*##             | 8/19 (42.1)          | 18/31 (58.1)         | <b>&lt;0.001</b>   | 72/93 (77.4)                | 0.195                       | 5/11 (45.5)         | 0.032                 |
| RV+, n/N (%)                | 37/56 (66.1)*#              | 5/19 (26.3)          | 10/31 (32.3)         | <b>0.001</b>       | 64/97 (66.0)                | 1                           | 5/11 (45.5)         | 0.199                 |
| RVC+, n/N (%)               | 26/56 (46.4)*               | 5/19 (26.3)          | 4/31 (12.9)          | <b>0.004</b>       | 41/93 (44.1)                | 0.865                       | 3/11 (27.3)         | 0.348                 |
| RVA+, n/N (%)               | 11/56 (19.6)                | 0/19 (0)             | 6/31 (19.4)          | 0.082              | 16/93 (17.2)                | 0.827                       | 0/11 (0)            | 0.207                 |
| RSV+, n/N (%)               | 7/51 (13.7)                 | 0/19 (0)             | 3/31 (9.7)           | 0.247              | 7/84 (8.3)                  | 0.386                       | 0/9 (0)             | 1                     |
| No. of viruses+, mean (SD)  | 1.13 (0.76)#,<br>n=45       | 0.47 (0.61),<br>n=19 | 0.87 (0.92),<br>n=31 | <b>0.011</b>       | 0.85 (0.64),<br>n=81        | <b>0.028</b>                | 0.56 (0.73),<br>n=9 | 0.193                 |
| Bacteria+, n/N (%)          | 32/45 (71.1)                | 15/19 (78.9)         | 19/31 (61.3)         | 0.415              | 40/75 (53.3)                | 0.058                       | 3/9 (33.3)          | 0.485                 |

|                                                                   |                        |                      |                      |       |                        |              |                     |       |
|-------------------------------------------------------------------|------------------------|----------------------|----------------------|-------|------------------------|--------------|---------------------|-------|
| No. of bacteria +, mean (SD)                                      | 1.09 (0.90),<br>n=45   | 1.21 (0.92),<br>n=19 | 1.00 (1.00),<br>n=31 | 0.743 | 0.71 (0.78),<br>n=82   | <b>0.014</b> | 0.33 (0.50),<br>n=9 | 0.163 |
| No. of viruses+ and bacteria+, mean (SD)                          | 2.22 (1.28),<br>n=45   | 1.68 (0.95),<br>n=19 | 1.87 (1.26),<br>n=31 | 0.213 | 1.56 (1.08),<br>n=81   | <b>0.002</b> | 0.89 (1.17),<br>n=9 | 0.086 |
| <b>Symptoms</b>                                                   |                        |                      |                      |       |                        |              |                     |       |
| Symptoms of URTI, n/N (%)                                         | 51/56 (91.1)           |                      |                      |       | 82/98 (83.7)           | 0.231        |                     |       |
| Time from first symptom to recruitment, mean (SD), days           | 4.43 (3.61),<br>n=56   |                      |                      |       | 3.48 (3.11),<br>n=98   | 0.088        |                     |       |
| Time from first symptom to hospital presentation, mean (SD), days | 3.46 (3.33),<br>n=56   |                      |                      |       | 2.62 (2.98),<br>n=99   | 0.105        |                     |       |
| Time from presentation to recruitment, mean (SD), days            | 20.44 (17.43),<br>n=44 |                      |                      |       | 16.88 (11.89),<br>n=77 | 0.186        |                     |       |
| Current doctor-diagnosed wheeze, n/N (%)                          | 56/56 (100)            |                      |                      |       | 99/99 (100)            |              |                     |       |
| Severity z-score, mean (SD)                                       | 0.48 (0.81),<br>n=53   |                      |                      |       | 0.57 (0.78),<br>n=87   | 0.503        |                     |       |
| Cough, n/N (%)                                                    | 49/54 (90.7)           |                      |                      |       | 91/97 (93.8)           | 0.524        |                     |       |
| Wheeze, n/N (%)                                                   | 53/56 (94.6)           |                      |                      |       | 95/98 (96.9)           | 0.669        |                     |       |
| Short of breath, n/N (%)                                          | 53/56 (94.6)           |                      |                      |       | 92/98 (93.9)           | 1            |                     |       |
| Fever, n/N (%)                                                    | 25/56 (44.6)           |                      |                      |       | 38/98 (38.8)           | 0.5          |                     |       |
| Weak and tired, n/N (%)                                           | 29/56 (51.8)           |                      |                      |       | 55/98 (56.1)           | 0.618        |                     |       |
| Runny nose, n/N (%)                                               | 40/56 (71.4)           |                      |                      |       | 65/98 (66.3)           | 0.591        |                     |       |
| Congestion, n/N (%)                                               | 26/55 (47.3)           |                      |                      |       | 36/98 (36.7)           | 0.232        |                     |       |
| Sneeze, n/N (%)                                                   | 27/55 (49.1)           |                      |                      |       | 48/98 (49.0)           | 1            |                     |       |

|                      |            |            |      |
|----------------------|------------|------------|------|
| Sore throat, n/N (%) | 2/56 (3.6) | 2/99 (2.0) | 0.62 |
|----------------------|------------|------------|------|

**Hospital Admission and Medication**

|                                                        |                        |                        |       |
|--------------------------------------------------------|------------------------|------------------------|-------|
| Admitted to hospital, n/N (%)                          | 27/56 (48.2)           | 42/99 (42.4)           | 0.505 |
| Time to discharge, mean (SD), hrs                      | 33.78 (22.39),<br>n=54 | 33.83 (35.37),<br>n=98 | 0.993 |
| Steroid, n/N (%)                                       | 34/39 (87.2)           | 68/90 (75.6)           | 0.163 |
| Time from steroid to sample collection, mean (SD), hrs | 10.49 (11.71),<br>n=32 | 8.73 (9.81),<br>n=55   | 0.456 |
| Antibiotics, n/N (%)                                   | 8/45 (17.8)            | 19/90 (21.1)           | 0.82  |

---

\* P < 0.05 Wheezing Exacerbation compared to Controls

# P < 0.05 Wheezing Exacerbation compared to Convalescence

## P < 0.001 Wheezing Exacerbation compared to Convalescence

Table 2: Characteristics of the IRF7<sup>hi</sup> and IRF7<sup>lo</sup> phenotypes in the discovery and replication cohorts.

| N                                         | Discovery Cohort     |                      |                     | Replication Cohort   |                      |                          |                      |                          |
|-------------------------------------------|----------------------|----------------------|---------------------|----------------------|----------------------|--------------------------|----------------------|--------------------------|
|                                           | IRF7 <sup>hi</sup>   | IRF7 <sup>lo</sup>   | Hi vs Lo<br>p-value | IRF7 <sup>hi</sup>   | IRF7 <sup>low1</sup> | Hi vs<br>Low1<br>p-value | IRF7 <sup>low2</sup> | Hi vs<br>Low2<br>p-value |
|                                           | 26                   | 19                   |                     | 49                   | 29                   |                          | 21                   |                          |
| Age, mean (SD), yrs                       | 4.73 (3.34),<br>n=26 | 3.65 (2.85),<br>n=19 | 0.26                | 4.99 (3.51),<br>n=49 | 5.85 (3.29),<br>n=29 | 0.285                    | 6.05 (4.27),<br>n=21 | 0.28                     |
| Male Gender, n/N (%)                      | 14/26 (53.8)         | 10/19 (52.6)         | 1                   | 27/49 (55.1)         | 23/29 (79.3)         | <b>0.05</b>              | 12/21 (57.1)         | 1                        |
| Caucasian, n/N (%)                        | 10/26 (38.5)         | 11/19 (57.9)         | 0.237               | 23/48 (47.9)         | 11/28 (39.3)         | 0.485                    | 13/20 (65.0)         | 0.287                    |
| Spring recruitment, n/N (%)               | 3/26 (11.5)          | 1/19 (5.3)           | 0.627               | 13/49 (26.5)         | 7/29 (24.1)          | 1                        | 7/21 (33.3)          | 0.576                    |
| Autumn recruitment, n/N (%)               | 4/26 (15.4)          | 2/19 (10.5)          | 1                   | 10/49 (20.4)         | 12/29 (41.4)         | 0.068                    | 6/21 (28.6)          | 0.538                    |
| Winter recruitment, n/N (%)               | 19/26 (73.1)         | 16/19 (84.2)         | 0.481               | 25/49 (51.0)         | 10/29 (34.5)         | 0.168                    | 7/21 (33.3)          | 0.2                      |
| Overall Allergy, n/N (%)                  | 20/26 (76.9)         | 8/19 (42.1)          | <b>0.029</b>        | 37/49 (75.5)         | 25/29 (86.2)         | 0.385                    | 16/21 (76.2)         | 1                        |
| AeroAllergy, n/N (%)                      | 19/26 (73.1)         | 6/19 (31.6)          | <b>0.008</b>        | 31/49 (63.3)         | 23/29 (79.3)         | 0.204                    | 16/21 (76.2)         | 0.407                    |
| <b>Pathogen Detection</b>                 |                      |                      |                     |                      |                      |                          |                      |                          |
| Respiratory virus+, n/N (%)               | 22/26 (84.6)         | 16/17 (94.1)         | 0.633               | 38/47 (80.9)         | 16/26 (61.5)         | 0.096                    | 18/20 (90.0)         | 0.484                    |
| RV+, n/N (%)                              | 19/26 (73.1)         | 11/19 (57.9)         | 0.347               | 32/47 (68.1)         | 16/29 (55.2)         | 0.329                    | 16/21 (76.2)         | 0.575                    |
| RVC+, n/N (%)                             | 14/26 (53.8)         | 7/19 (36.8)          | 0.366               | 19/46 (41.3)         | 11/28 (39.3)         | 1                        | 11/19 (57.9)         | 0.279                    |
| RVA+, n/N (%)                             | 5/26 (19.2)          | 4/19 (21.1)          | 1                   | 9/46 (19.6)          | 4/28 (14.3)          | 0.755                    | 3/19 (15.8)          | 1                        |
| RSV+, n/N (%)                             | 1/25 (4.0)           | 4/17 (23.5)          | 0.14                | 6/43 (14.0)          | 0/25 (0)             | 0.078                    | 1/16 (6.3)           | 0.661                    |
| No. of Virus+, mean (SD)                  | 1.20 (0.87)<br>n=25  | 1.17 (0.58),<br>n=12 | 0.905               | 0.98 (0.72),<br>n=41 | 0.64 (0.57),<br>n=25 | 0.053                    | 0.87 (0.35),<br>n=15 | 0.58                     |
| Bacteria+, n/N (%)                        | 18/25 (72.0)         | 9/12 (75.0)          | 1                   | 23/39 (59.0)         | 10/23 (43.5)         | 0.296                    | 7/13 (53.8)          | 0.757                    |
| No. of Bacteria+, mean (SD)               | 1.12 (0.93),<br>n=25 | 1.08 (0.79),<br>n=12 | 0.907               | 0.80 (0.78),<br>n=41 | 0.52 (0.71),<br>n=25 | 0.143                    | 0.75 (0.86),<br>n=15 | 0.817                    |
| No. of virus+ and bacteria+,<br>mean (SD) | 2.32 (1.41),<br>n=25 | 2.25 (1.14),<br>n=12 | 0.882               | 1.78 (1.15),<br>n=41 | 1.16 (0.99),<br>n=25 | <b>0.029</b>             | 1.60 (0.91),<br>n=15 | 0.587                    |

### Symptoms Prior to Presentation to Hospital

|                                                                   |                      |                      |                  |                       |                      |              |                      |                  |
|-------------------------------------------------------------------|----------------------|----------------------|------------------|-----------------------|----------------------|--------------|----------------------|------------------|
| Symptoms of URTI, n/N (%)                                         | 23/26 (88.5)         | 18/19 (94.7)         | 0.627            | 45/49 (91.8)          | 23/29 (79.3)         | 0.161        | 14/20 (70.0)         | <b>0.029</b>     |
| Time from first symptom to hospital presentation, mean (SD), days | 2.31 (1.98),<br>n=26 | 4.74 (4.03),<br>n=19 | <b>0.011</b>     | 2.20 (1.76),<br>n=49  | 3.90 (4.59),<br>n=29 | <b>0.023</b> | 1.90 (1.80),<br>n=20 | 0.519            |
| Time from first symptom to recruitment, mean (SD), days           | 2.85 (2.0),<br>n=26  | 5.74 (4.16),<br>n=19 | <b>0.003</b>     | 3.102 (1.82),<br>n=49 | 4.59 (4.84),<br>n=29 | 0.057        | 2.80 (1.94),<br>n=20 | 0.541            |
| Severity zscore, mean (SD)                                        | 0.67 (0.74),<br>n=24 | 0.42 (0.76),<br>n=18 | 0.284            | 0.45 (0.93),<br>n=41  | 0.71 (0.55),<br>n=25 | 0.205        | 0.65 (0.66),<br>n=21 | 0.374            |
| Cough, n/N (%)                                                    | 20/25 (80)           | 18/18 (100)          | 0.064            | 44/49 (89.8)          | 28/28 (100)          | 0.152        | 19/20 (95.0)         | 0.664            |
| Cough duration, mean (SD), days                                   | 1.96 (1.51),<br>n=25 | 5.62 (3.20),<br>n=13 | <b>&lt;0.001</b> | 2.00 (1.17),<br>n=45  | 3.75 (4.44),<br>n=24 | <b>0.015</b> | 2.25 (1.77),<br>n=20 | 0.502            |
| Wheeze, n/N (%)                                                   | 26/26 (100)          | 16/19 (84.2)         | 0.068            | 48/49 (98.0)          | 28/29 (96.6)         | 1            | 19/20 (95.0)         | 0.499            |
| Wheeze duration, mean (SD), days                                  | 1.69 (.84),<br>n=26  | 2.35 (1.77),<br>n=17 | 0.106            | 1.74 (0.99),<br>n=47  | 3.56 (5.15),<br>n=27 | <b>0.022</b> | 1.85 (1.14),<br>n=20 | 0.704            |
| Short of breath, n/N (%)                                          | 26/26 (100)          | 16/19 (84.2)         | 0.068            | 47/49 (95.9)          | 27/29 (93.1)         | 0.625        | 18/20 (90.0)         | 0.574            |
| Short of breath duration, mean (SD), days                         | 1.62 (0.80),<br>n=26 | 2.18 (1.51),<br>n=17 | 0.12             | 1.61 (0.95),<br>n=46  | 3.41 (5.00),<br>n=29 | <b>0.02</b>  | 1.70 (1.17),<br>n=20 | 0.74             |
| Fever, n/N (%)                                                    | 10/26 (38.5)         | 9/19 (47.4)          | 0.761            | 29/49 (59.2)          | 7/29 (24.1)          | <b>0.004</b> | 2/20 (10.0)          | <b>&lt;0.001</b> |
| Fever duration, mean (SD), days                                   | 0.88 (1.58),<br>n=26 | 1.39 (2.09),<br>n=18 | 0.368            | 1.22 (1.34),<br>n=49  | 0.64 (1.50),<br>n=28 | 0.084        | 0.20 (0.70),<br>n=20 | <b>0.002</b>     |
| Weak and tired, n/N (%)                                           | 8/26 (30.8)          | 13/19 (68.4)         | <b>0.017</b>     | 29/49 (59.2)          | 17/29 (58.6)         | 1            | 9/20 (45.0)          | 0.301            |
| Weak and tired duration, mean (SD), days                          | 1.23 (2.23),<br>n=26 | 2.24 (2.33),<br>n=17 | 0.164            | 1.38 (1.55),<br>n=48  | 2.22 (4.07),<br>n=27 | 0.201        | 1.05 (1.50),<br>n=20 | 0.43             |
| Runny nose, n/N (%)                                               | 17/26 (65.4)         | 15/19 (78.9)         | 0.507            | 37/49 (75.5)          | 19/29 (65.5)         | 0.436        | 9/20 (45.0)          | <b>0.024</b>     |
| Runny nose duration, mean (SD), days                              | 2.12 (2.22),<br>n=25 | 3.94 (4.49),<br>n=17 | 0.089            | 2.52 (3.38),<br>n=48  | 2.41 (3.02),<br>n=29 | 0.889        | 1.40 (2.06),<br>n=20 | 0.174            |
| Congestion, n/N (%)                                               | 10/25 (40.0)         | 9/19 (47.4)          | 0.761            | 21/49 (42.9)          | 10/29 (34.5)         | 0.485        | 5/20 (25.0)          | 0.185            |
| Congestion duration, mean (SD), days                              | 1.24 (1.86),<br>n=25 | 3.00 (4.76),<br>n=18 | 0.1              | 1.63 (3.47),<br>n=49  | 1.41 (2.90),<br>n=29 | 0.776        | 0.95 (2.01),<br>n=20 | 0.413            |
| Sneeze, n/N (%)                                                   | 9/25 (36.0)          | 12/19 (63.2)         | 0.127            | 25/49 (51.0)          | 14/29 (48.3)         | 1            | 9/20 (45.0)          | 0.792            |

|                                  |                      |                      |       |                      |                      |       |                      |       |
|----------------------------------|----------------------|----------------------|-------|----------------------|----------------------|-------|----------------------|-------|
| Sneeze duration, mean (SD), days | 1.40 (2.24),<br>n=25 | 3.31 (4.88),<br>n=16 | 0.096 | 1.85 (3.50),<br>n=47 | 1.46 (1.99),<br>n=28 | 0.595 | 1.20 (1.96),<br>n=20 | 0.439 |
| Sore throat, n/N (%)             | 2/26 (7.7)           | 0 (0)                | 0.501 | 0/49 (0)             | 1/29 (3.4)           | 0.372 | 1/21 (4.8)           | 0.3   |

### Hospital Admission and Medication

|                                                        |                        |                        |              |                        |                        |       |                        |       |
|--------------------------------------------------------|------------------------|------------------------|--------------|------------------------|------------------------|-------|------------------------|-------|
| Admission to hospital, n/N (%)                         | 7/26 (26.9)            | 12/19 (63.2)           | <b>0.031</b> | 22/49 (44.9)           | 12/29 (41.4)           | 0.816 | 8/21 (38.1)            | 0.793 |
| Time from presentation to recruitment, mean (SD), days | 0.85 (0.61),<br>n=26   | 0.74 (0.73),<br>n=19   | 0.589        | 0.90 (0.71),<br>n=49   | 0.69 (0.71),<br>n=29   | 0.217 | 0.90 (0.72),<br>n=20   | 0.991 |
| Time to discharge, mean (SD), hr                       | 27.64 (16.06),<br>n=26 | 39.07 (29.07),<br>n=18 | 0.102        | 29.83 (26.67),<br>n=48 | 35.28 (45.78),<br>n=29 | 0.511 | 40.95 (36.97),<br>n=21 | 0.163 |
| Steroid, n/N (%)                                       | 16/17 (94.1)           | 12/14 (85.7)           | 0.576        | 32/45 (71.1)           | 21/28 (75.0)           | 0.792 | 15/17 (83.2)           | 0.2   |
| Time from steroid to sample collection, mean (SD), hr  | 6.31 (5.20),<br>n=16   | 11.77 (14.25),<br>n=10 | 0.174        | 7.61 (6.33),<br>n=24   | 11.34 (14.97),<br>n=17 | 0.28  | 7.47 (6.36),<br>n=14   | 0.947 |
| Antibiotics, n/N (%)                                   | 3/21 (14.3)            | 3/15 (20.0)            | 0.677        | 10/45 (22.2)           | 7/26 (26.9)            | 0.774 | 2/19 (10.5)            | 0.484 |
| No. of Vent doses in 6hr                               | 7.39 (3.55),<br>n=23   | 6.17 (3.35),<br>n=12   | 0.331        | 7.37 (3.35),<br>n=43   | 7.74 (3.43),<br>n=27   | 0.658 | 8.48 (5.69),<br>n=21   | 0.332 |
| No. of Vent doses in 12hr                              | 10.43 (5.03),<br>n=23  | 9.33 (5.24),<br>n=12   | 0.548        | 10.58 (6.11),<br>n=43  | 10.59 (5.28),<br>n=27  | 0.994 | 12.29 (6.77),<br>n=21  | 0.316 |
| No. of Vent doses in 24hr                              | 13.57 (7.43),<br>n=23  | 10.50 (5.70),<br>n=12  | 0.221        | 14.46 (10.79),<br>n=43 | 14.26 (7.73),<br>n=27  | 0.932 | 18.19 (9.10),<br>n=21  | 0.178 |

### First Respiratory Representation

|                                                                                                            |             |              |              |              |              |       |             |       |
|------------------------------------------------------------------------------------------------------------|-------------|--------------|--------------|--------------|--------------|-------|-------------|-------|
| Time to first respiratory representation to hospital within the first 12 months of follow-up, median, days | >365        | 225          | <b>0.015</b> | >365         | >365         | 0.682 | >365        | 0.57  |
| No. of children represented within the first 12 months of follow-up, n/N (%)                               | 8/26 (30.8) | 13/19 (68.4) | <b>0.017</b> | 19/48 (39.6) | 10/29 (34.5) | 0.809 | 7/21 (33.3) | 0.788 |



|                                                                                                            |              |              |             |
|------------------------------------------------------------------------------------------------------------|--------------|--------------|-------------|
| Time to first respiratory representation to hospital within the first 24 months of follow-up, median, days | >730         | 225          | <b>0.05</b> |
| No. of children represented within the first 24 months of follow-up, n/N (%)                               | 11/26 (42.3) | 13/19 (68.4) | 0.131       |

---



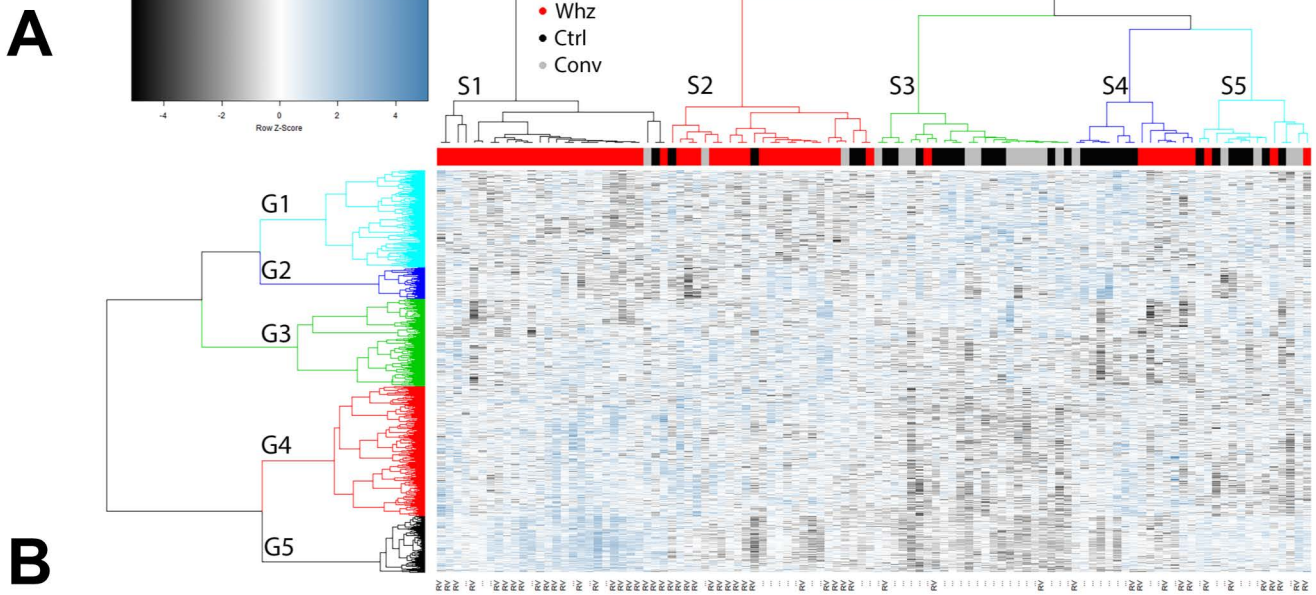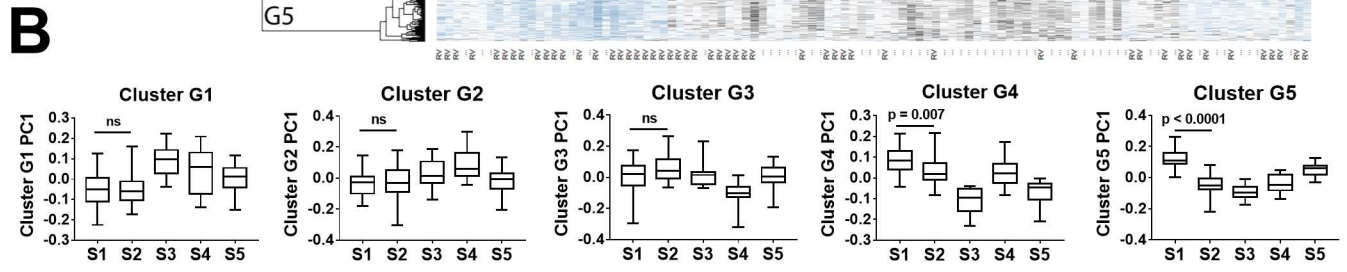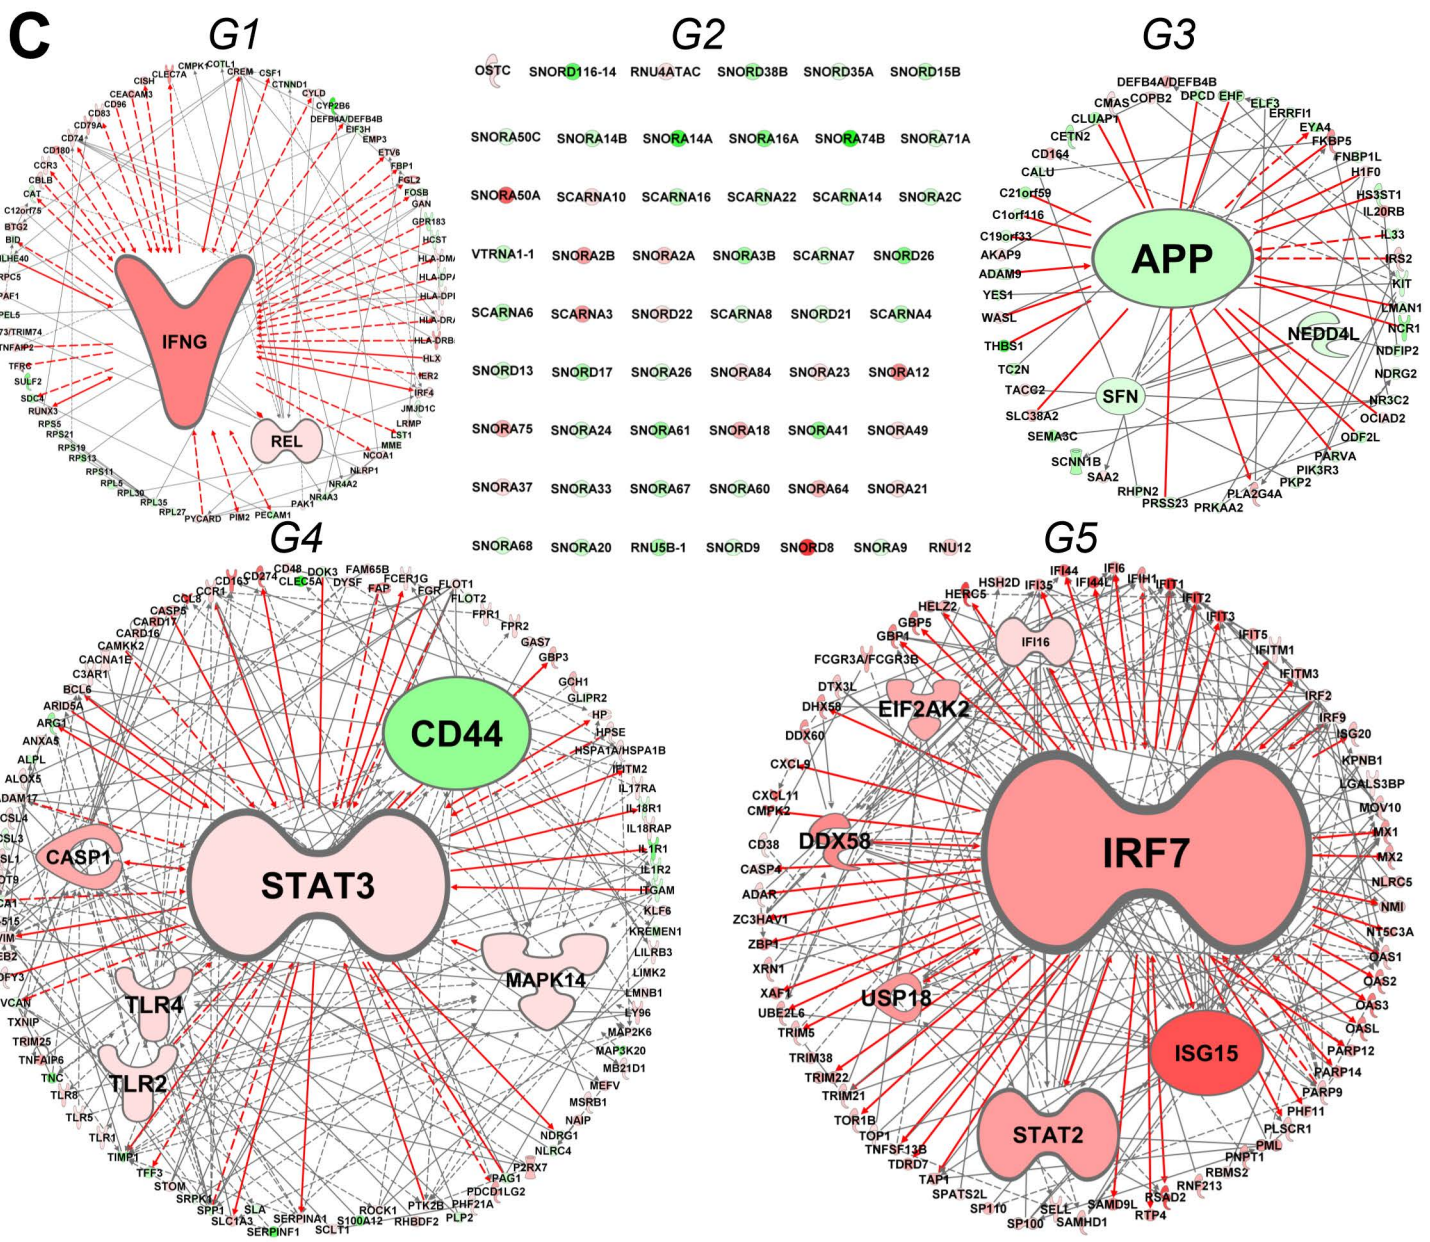

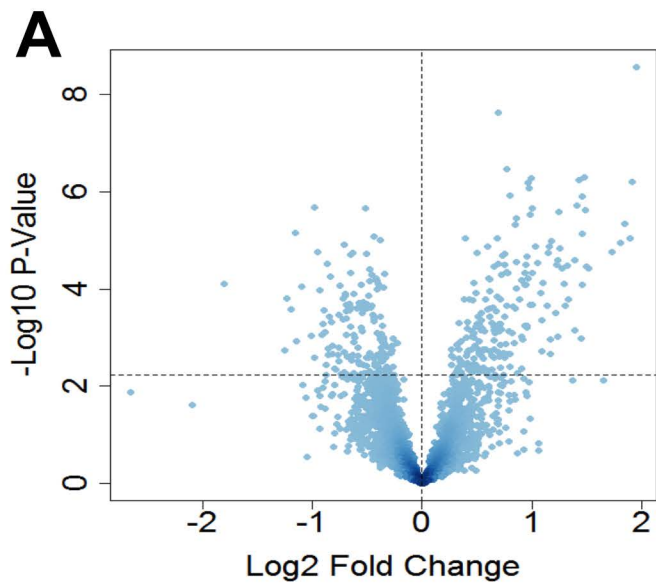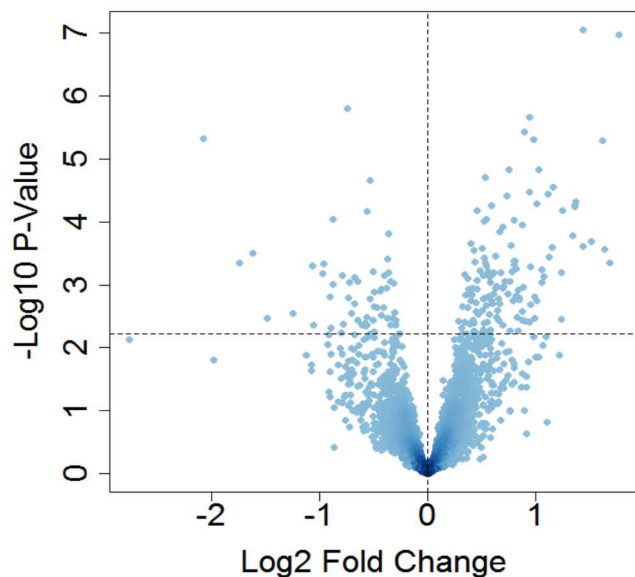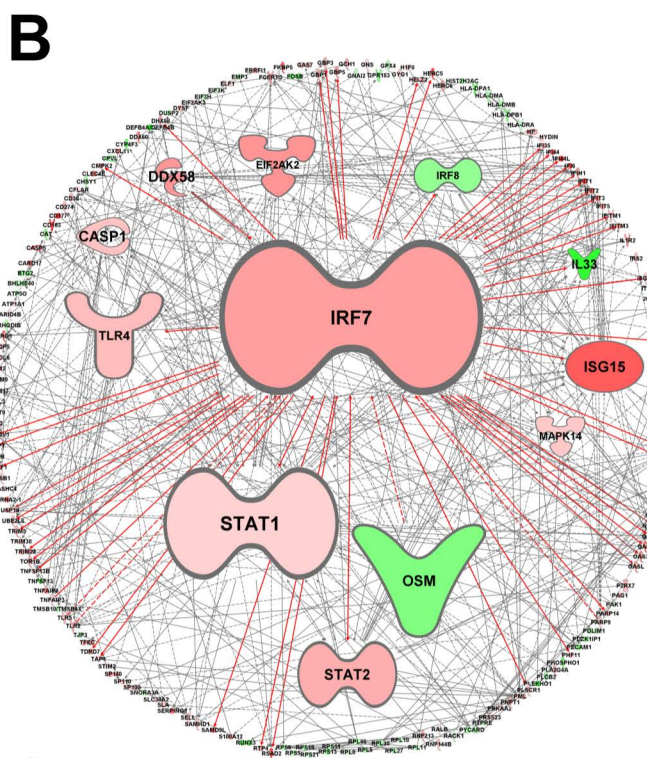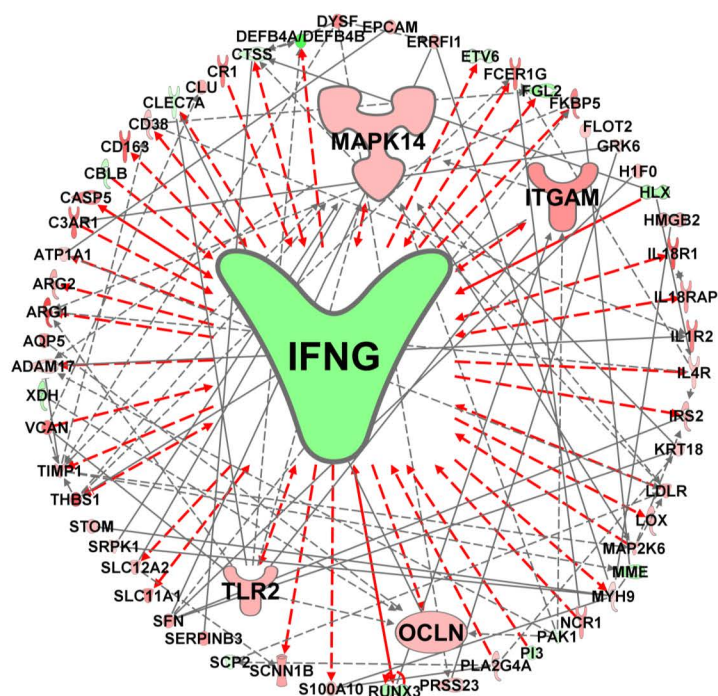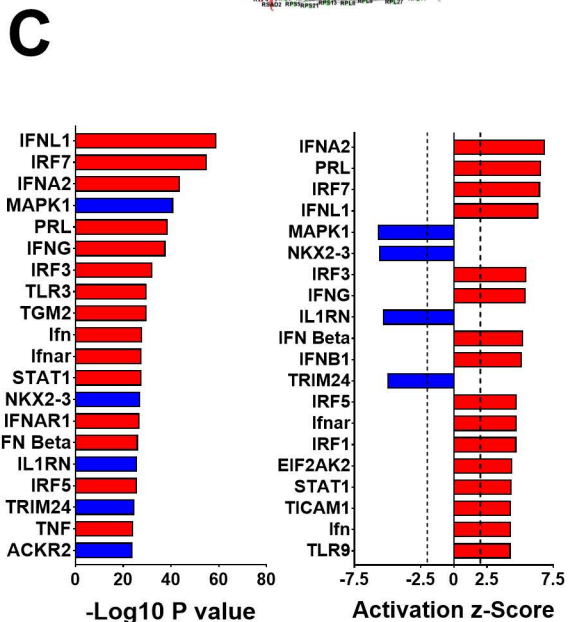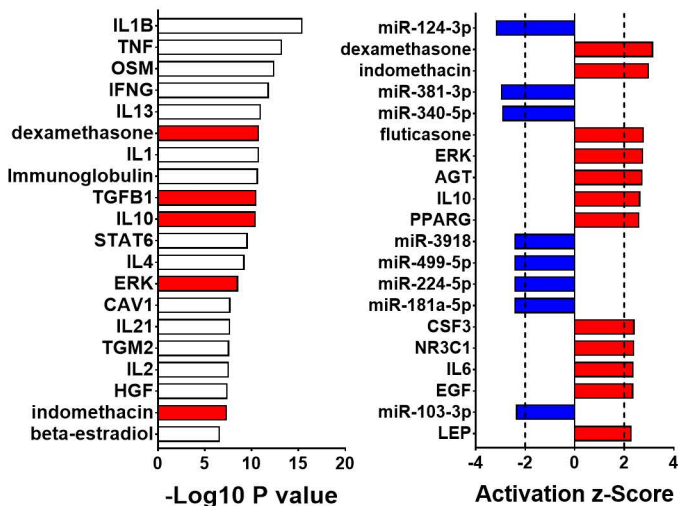

# IRF7<sup>Hi</sup> exacerbations

# Overlap

# IRF7<sup>Lo</sup> exacerbations

Extracellular Space

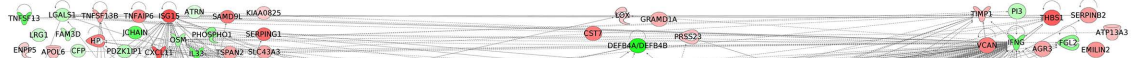

Plasma Membrane

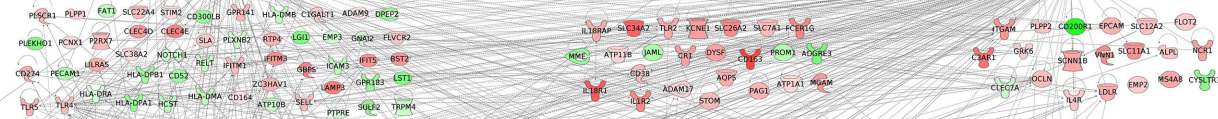

Cytoplasm

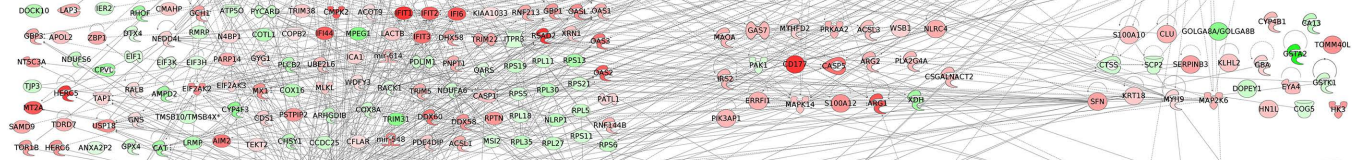

Nucleus

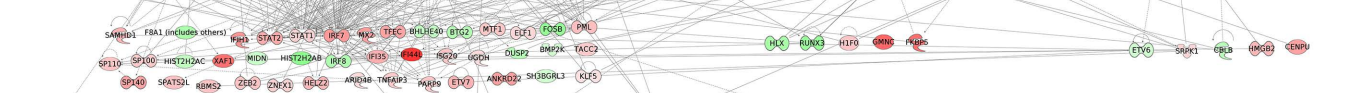

Other

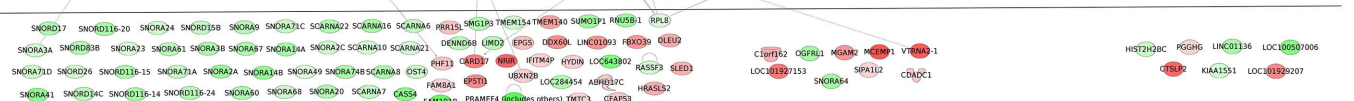

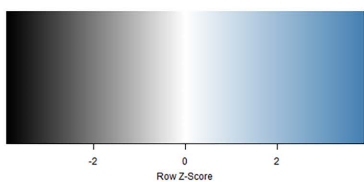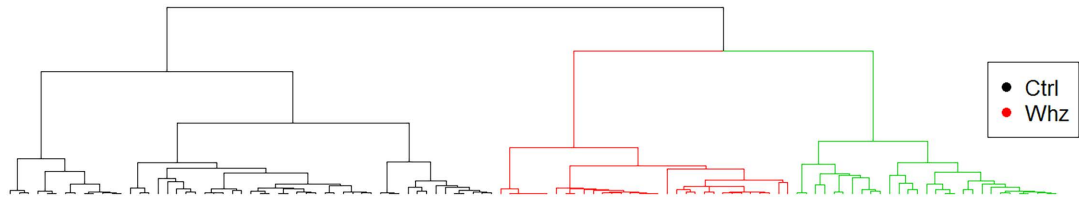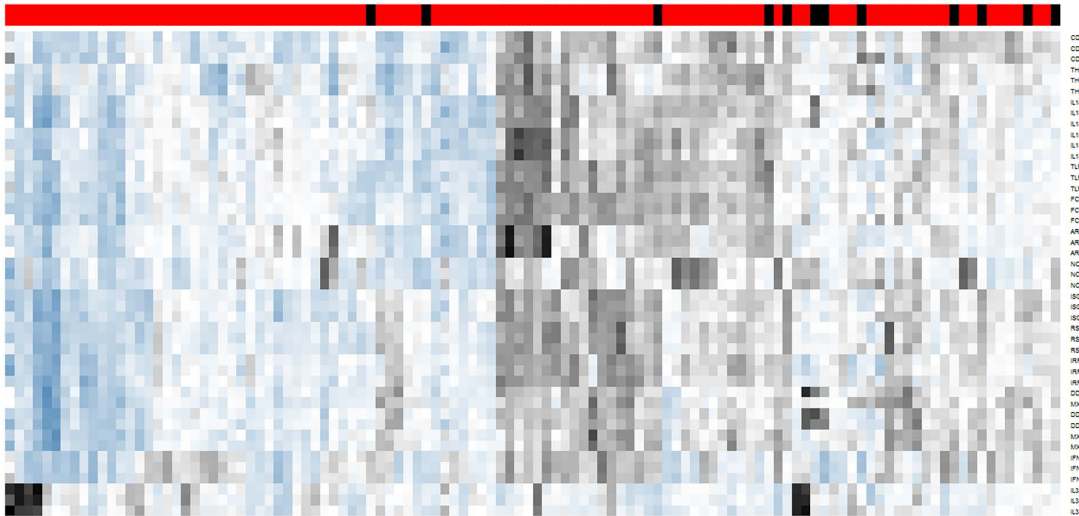

Source: http://biorxiv.org/content/10.1101/222950v1.full.pdf
